# Supplementary material for: LncRNA TCONS_00323213 Promotes Myogenic Differentiation by Interacting with PKNOX2 to Upregulate MyoG in Porcine Satellite Cells
Source: MDPI journal article supplement (doi:10.3390/ijms24076773), 2023-04-05
Supplement: s1 [file s1]

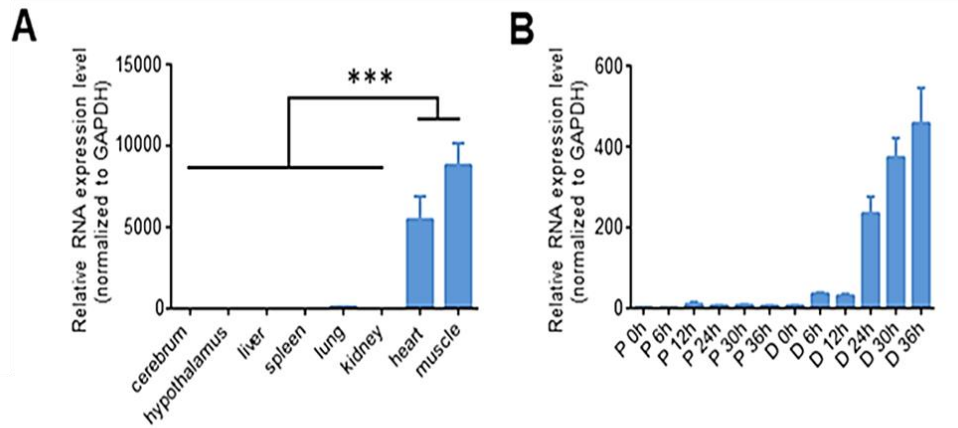

**Figure S1.** *TCONS\_00323213* is a muscle-specific expression and closely relative to muscle differentiation lncRNA. (A) Real-time quantitative PCR analysis of *TCONS\_00323213* expression in 1-week old male pig tissues. (B) Real-time quantitative PCR analysis of *TCONS\_00323213* expression during proliferation and differentiation state in primary pig skeletal muscle satellite cells, respectively. Letter P and D represent cells cultured in growth and differentiation medium, respectively. Mean values  $\pm$  SD,  $n = 3$ .  $*p < 0.05$ ,  $**p < 0.01$ ,  $***p < 0.001$ .
