# Supplementary material for: LncRNA TCONS_00323213 Promotes Myogenic Differentiation by Interacting with PKNOX2 to Upregulate MyoG in Porcine Satellite Cells
Source: MDPI journal article supplement (doi:10.3390/ijms24076773), 2023-04-05
Supplement: s1 [file s1]

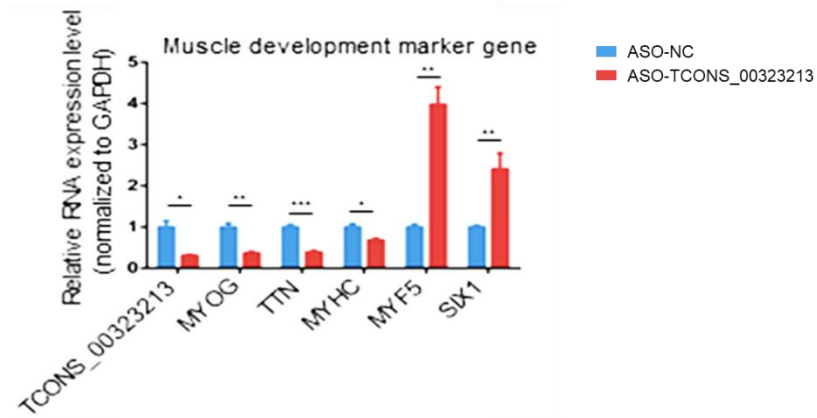

**Figure S2.** Real-time quantitative PCR analysis of marker genes expression level in differentiated 36 h after ASO-*TCONS\_00323213* transfected in PSCs. Mean values  $\pm$  SD,  $n = 3$ . \* $p < 0.05$ , \*\* $p < 0.01$ , \*\*\* $p < 0.001$ .
