# Supplementary material for: LncRNA TCONS_00323213 Promotes Myogenic Differentiation by Interacting with PKNOX2 to Upregulate MyoG in Porcine Satellite Cells
Source: Int J Mol Sci. 2023 Apr 5;24(7):6773. doi: 10.3390/ijms24076773 (PMC10094759; doi:10.3390/ijms24076773)
Supplement: Supplementary file 1 [file ijms-24-06773-s001.zip › Table S1.xlsx]

## Sheet: Sheet1
Name	sequence
TCONS_00323213 ASO sequence - 1	CCTTGCCTTCTTTTCTGTTT
si-PKNOX2 sequence-1	sence:CCAUGUCUGGAGUCUCCAATT	antisence:UUGGAGACUCCAGACAUGGTT
si-PKNOX2 sequence-2	sence:CCUCCAAGACCCUGUCUAUTT	antisence:AUAGACAGGGUCUUGGAGGTT
