# Supplementary material for: LncRNA TCONS_00323213 Promotes Myogenic Differentiation by Interacting with PKNOX2 to Upregulate MyoG in Porcine Satellite Cells
Source: Int J Mol Sci. 2023 Apr 5;24(7):6773. doi: 10.3390/ijms24076773 (PMC10094759; doi:10.3390/ijms24076773)
Supplement: Supplementary file 1 [file ijms-24-06773-s001.zip › Table S2.xlsx]

## Sheet: Sheet1
Differentially Expressed Genes
ENSSSCG00000000002
ENSSSCG00000000010
ENSSSCG00000000020
ENSSSCG00000000024
ENSSSCG00000000029
ENSSSCG00000000040
ENSSSCG00000000067
ENSSSCG00000000068
ENSSSCG00000000074
ENSSSCG00000000079
ENSSSCG00000000082
ENSSSCG00000000092
ENSSSCG00000000094
ENSSSCG00000000106
ENSSSCG00000000108
ENSSSCG00000000113
ENSSSCG00000000117
ENSSSCG00000000118
ENSSSCG00000000121
ENSSSCG00000000130
ENSSSCG00000000131
ENSSSCG00000000135
ENSSSCG00000000136
ENSSSCG00000000142
ENSSSCG00000000145
ENSSSCG00000000148
ENSSSCG00000000151
ENSSSCG00000000159
ENSSSCG00000000162
ENSSSCG00000000171
ENSSSCG00000000182
ENSSSCG00000000183
ENSSSCG00000000184
ENSSSCG00000000186
ENSSSCG00000000188
ENSSSCG00000000203
ENSSSCG00000000206
ENSSSCG00000000212
ENSSSCG00000000216
ENSSSCG00000000217
ENSSSCG00000000228
ENSSSCG00000000231
ENSSSCG00000000236
ENSSSCG00000000238
ENSSSCG00000000239
ENSSSCG00000000241
ENSSSCG00000000247
ENSSSCG00000000248
ENSSSCG00000000252
ENSSSCG00000000253
ENSSSCG00000000257
ENSSSCG00000000258
ENSSSCG00000000263
ENSSSCG00000000265
ENSSSCG00000000268
ENSSSCG00000000275
ENSSSCG00000000277
ENSSSCG00000000278
ENSSSCG00000000279
ENSSSCG00000000281
ENSSSCG00000000289
ENSSSCG00000000291
ENSSSCG00000000292
ENSSSCG00000000295
ENSSSCG00000000297
ENSSSCG00000000299
ENSSSCG00000000353
ENSSSCG00000000385
ENSSSCG00000000386
ENSSSCG00000000398
ENSSSCG00000000399
ENSSSCG00000000400
ENSSSCG00000000401
ENSSSCG00000000403
ENSSSCG00000000413
ENSSSCG00000000415
ENSSSCG00000000431
ENSSSCG00000000433
ENSSSCG00000000436
ENSSSCG00000000439
ENSSSCG00000000443
ENSSSCG00000000455
ENSSSCG00000000475
ENSSSCG00000000482
ENSSSCG00000000492
ENSSSCG00000000516
ENSSSCG00000000528
ENSSSCG00000000551
ENSSSCG00000000559
ENSSSCG00000000573
ENSSSCG00000000600
ENSSSCG00000000601
ENSSSCG00000000605
ENSSSCG00000000607
ENSSSCG00000000610
ENSSSCG00000000634
ENSSSCG00000000636
ENSSSCG00000000647
ENSSSCG00000000661
ENSSSCG00000000664
ENSSSCG00000000683
ENSSSCG00000000687
ENSSSCG00000000688
ENSSSCG00000000692
ENSSSCG00000000693
ENSSSCG00000000699
ENSSSCG00000000703
ENSSSCG00000000704
ENSSSCG00000000709
ENSSSCG00000000716
ENSSSCG00000000720
ENSSSCG00000000721
ENSSSCG00000000722
ENSSSCG00000000730
ENSSSCG00000000738
ENSSSCG00000000739
ENSSSCG00000000740
ENSSSCG00000000741
ENSSSCG00000000745
ENSSSCG00000000748
ENSSSCG00000000749
ENSSSCG00000000760
ENSSSCG00000000765
ENSSSCG00000000774
ENSSSCG00000000778
ENSSSCG00000000783
ENSSSCG00000000795
ENSSSCG00000000807
ENSSSCG00000000808
ENSSSCG00000000810
ENSSSCG00000000811
ENSSSCG00000000837
ENSSSCG00000000838
ENSSSCG00000000859
ENSSSCG00000000875
ENSSSCG00000000907
ENSSSCG00000000916
ENSSSCG00000000932
ENSSSCG00000000936
ENSSSCG00000000937
ENSSSCG00000000948
ENSSSCG00000000950
ENSSSCG00000000960
ENSSSCG00000000968
ENSSSCG00000000975
ENSSSCG00000000982
ENSSSCG00000000983
ENSSSCG00000000991
ENSSSCG00000001009
ENSSSCG00000001011
ENSSSCG00000001025
ENSSSCG00000001036
ENSSSCG00000001042
ENSSSCG00000001052
ENSSSCG00000001065
ENSSSCG00000001078
ENSSSCG00000001085
ENSSSCG00000001091
ENSSSCG00000001100
ENSSSCG00000001137
ENSSSCG00000001205
ENSSSCG00000001229
ENSSSCG00000001232
ENSSSCG00000001233
ENSSSCG00000001234
ENSSSCG00000001235
ENSSSCG00000001248
ENSSSCG00000001253
ENSSSCG00000001254
ENSSSCG00000001341
ENSSSCG00000001347
ENSSSCG00000001362
ENSSSCG00000001388
ENSSSCG00000001392
ENSSSCG00000001393
ENSSSCG00000001394
ENSSSCG00000001398
ENSSSCG00000001401
ENSSSCG00000001403
ENSSSCG00000001409
ENSSSCG00000001411
ENSSSCG00000001419
ENSSSCG00000001427
ENSSSCG00000001428
ENSSSCG00000001441
ENSSSCG00000001453
ENSSSCG00000001459
ENSSSCG00000001463
ENSSSCG00000001469
ENSSSCG00000001471
ENSSSCG00000001472
ENSSSCG00000001473
ENSSSCG00000001478
ENSSSCG00000001481
ENSSSCG00000001483
ENSSSCG00000001503
ENSSSCG00000001507
ENSSSCG00000001510
ENSSSCG00000001513
ENSSSCG00000001518
ENSSSCG00000001535
ENSSSCG00000001550
ENSSSCG00000001555
ENSSSCG00000001559
ENSSSCG00000001560
ENSSSCG00000001561
ENSSSCG00000001566
ENSSSCG00000001567
ENSSSCG00000001572
ENSSSCG00000001573
ENSSSCG00000001576
ENSSSCG00000001582
ENSSSCG00000001589
ENSSSCG00000001597
ENSSSCG00000001616
ENSSSCG00000001619
ENSSSCG00000001636
ENSSSCG00000001637
ENSSSCG00000001639
ENSSSCG00000001650
ENSSSCG00000001664
ENSSSCG00000001695
ENSSSCG00000001703
ENSSSCG00000001705
ENSSSCG00000001706
ENSSSCG00000001710
ENSSSCG00000001724
ENSSSCG00000001726
ENSSSCG00000001727
ENSSSCG00000001729
ENSSSCG00000001734
ENSSSCG00000001738
ENSSSCG00000001775
ENSSSCG00000001787
ENSSSCG00000001789
ENSSSCG00000001793
ENSSSCG00000001795
ENSSSCG00000001798
ENSSSCG00000001807
ENSSSCG00000001808
ENSSSCG00000001810
ENSSSCG00000001814
ENSSSCG00000001816
ENSSSCG00000001823
ENSSSCG00000001832
ENSSSCG00000001844
ENSSSCG00000001848
ENSSSCG00000001849
ENSSSCG00000001872
ENSSSCG00000001875
ENSSSCG00000001885
ENSSSCG00000001888
ENSSSCG00000001895
ENSSSCG00000001905
ENSSSCG00000001912
ENSSSCG00000001920
ENSSSCG00000001931
ENSSSCG00000001938
ENSSSCG00000001949
ENSSSCG00000001952
ENSSSCG00000001977
ENSSSCG00000001989
ENSSSCG00000001993
ENSSSCG00000002001
ENSSSCG00000002002
ENSSSCG00000002004
ENSSSCG00000002009
ENSSSCG00000002014
ENSSSCG00000002026
ENSSSCG00000002037
ENSSSCG00000002038
ENSSSCG00000002041
ENSSSCG00000002052
ENSSSCG00000002135
ENSSSCG00000002140
ENSSSCG00000002144
ENSSSCG00000002187
ENSSSCG00000002241
ENSSSCG00000002254
ENSSSCG00000002257
ENSSSCG00000002266
ENSSSCG00000002274
ENSSSCG00000002275
ENSSSCG00000002279
ENSSSCG00000002280
ENSSSCG00000002290
ENSSSCG00000002309
ENSSSCG00000002310
ENSSSCG00000002322
ENSSSCG00000002329
ENSSSCG00000002349
ENSSSCG00000002361
ENSSSCG00000002368
ENSSSCG00000002373
ENSSSCG00000002375
ENSSSCG00000002380
ENSSSCG00000002383
ENSSSCG00000002388
ENSSSCG00000002400
ENSSSCG00000002410
ENSSSCG00000002423
ENSSSCG00000002442
ENSSSCG00000002443
ENSSSCG00000002450
ENSSSCG00000002451
ENSSSCG00000002456
ENSSSCG00000002474
ENSSSCG00000002478
ENSSSCG00000002479
ENSSSCG00000002486
ENSSSCG00000002490
ENSSSCG00000002494
ENSSSCG00000002501
ENSSSCG00000002507
ENSSSCG00000002512
ENSSSCG00000002515
ENSSSCG00000002573
ENSSSCG00000002610
ENSSSCG00000002635
ENSSSCG00000002639
ENSSSCG00000002651
ENSSSCG00000002653
ENSSSCG00000002656
ENSSSCG00000002658
ENSSSCG00000002680
ENSSSCG00000002688
ENSSSCG00000002689
ENSSSCG00000002696
ENSSSCG00000002708
ENSSSCG00000002712
ENSSSCG00000002734
ENSSSCG00000002736
ENSSSCG00000002737
ENSSSCG00000002739
ENSSSCG00000002747
ENSSSCG00000002749
ENSSSCG00000002752
ENSSSCG00000002755
ENSSSCG00000002764
ENSSSCG00000002768
ENSSSCG00000002781
ENSSSCG00000002782
ENSSSCG00000002783
ENSSSCG00000002786
ENSSSCG00000002802
ENSSSCG00000002808
ENSSSCG00000002814
ENSSSCG00000002817
ENSSSCG00000002828
ENSSSCG00000002836
ENSSSCG00000002841
ENSSSCG00000002849
ENSSSCG00000002866
ENSSSCG00000002867
ENSSSCG00000002891
ENSSSCG00000002893
ENSSSCG00000002895
ENSSSCG00000002901
ENSSSCG00000002904
ENSSSCG00000002908
ENSSSCG00000002917
ENSSSCG00000002918
ENSSSCG00000002921
ENSSSCG00000002923
ENSSSCG00000002927
ENSSSCG00000002938
ENSSSCG00000002944
ENSSSCG00000002950
ENSSSCG00000002957
ENSSSCG00000002960
ENSSSCG00000002967
ENSSSCG00000002968
ENSSSCG00000002969
ENSSSCG00000002971
ENSSSCG00000002986
ENSSSCG00000002987
ENSSSCG00000002993
ENSSSCG00000002994
ENSSSCG00000002998
ENSSSCG00000003016
ENSSSCG00000003022
ENSSSCG00000003024
ENSSSCG00000003030
ENSSSCG00000003037
ENSSSCG00000003038
ENSSSCG00000003040
ENSSSCG00000003045
ENSSSCG00000003047
ENSSSCG00000003049
ENSSSCG00000003062
ENSSSCG00000003078
ENSSSCG00000003092
ENSSSCG00000003110
ENSSSCG00000003112
ENSSSCG00000003113
ENSSSCG00000003119
ENSSSCG00000003124
ENSSSCG00000003128
ENSSSCG00000003131
ENSSSCG00000003135
ENSSSCG00000003140
ENSSSCG00000003142
ENSSSCG00000003145
ENSSSCG00000003146
ENSSSCG00000003149
ENSSSCG00000003155
ENSSSCG00000003160
ENSSSCG00000003161
ENSSSCG00000003170
ENSSSCG00000003191
ENSSSCG00000003192
ENSSSCG00000003201
ENSSSCG00000003214
ENSSSCG00000003216
ENSSSCG00000003222
ENSSSCG00000003234
ENSSSCG00000003236
ENSSSCG00000003238
ENSSSCG00000003239
ENSSSCG00000003251
ENSSSCG00000003256
ENSSSCG00000003259
ENSSSCG00000003264
ENSSSCG00000003271
ENSSSCG00000003272
ENSSSCG00000003278
ENSSSCG00000003284
ENSSSCG00000003286
ENSSSCG00000003302
ENSSSCG00000003303
ENSSSCG00000003306
ENSSSCG00000003307
ENSSSCG00000003314
ENSSSCG00000003315
ENSSSCG00000003326
ENSSSCG00000003336
ENSSSCG00000003338
ENSSSCG00000003341
ENSSSCG00000003356
ENSSSCG00000003357
ENSSSCG00000003362
ENSSSCG00000003366
ENSSSCG00000003368
ENSSSCG00000003374
ENSSSCG00000003376
ENSSSCG00000003386
ENSSSCG00000003388
ENSSSCG00000003395
ENSSSCG00000003410
ENSSSCG00000003414
ENSSSCG00000003417
ENSSSCG00000003423
ENSSSCG00000003441
ENSSSCG00000003444
ENSSSCG00000003451
ENSSSCG00000003471
ENSSSCG00000003481
ENSSSCG00000003482
ENSSSCG00000003483
ENSSSCG00000003503
ENSSSCG00000003509
ENSSSCG00000003513
ENSSSCG00000003514
ENSSSCG00000003523
ENSSSCG00000003524
ENSSSCG00000003529
ENSSSCG00000003539
ENSSSCG00000003554
ENSSSCG00000003557
ENSSSCG00000003558
ENSSSCG00000003559
ENSSSCG00000003567
ENSSSCG00000003569
ENSSSCG00000003572
ENSSSCG00000003573
ENSSSCG00000003576
ENSSSCG00000003584
ENSSSCG00000003585
ENSSSCG00000003592
ENSSSCG00000003606
ENSSSCG00000003608
ENSSSCG00000003610
ENSSSCG00000003616
ENSSSCG00000003628
ENSSSCG00000003632
ENSSSCG00000003633
ENSSSCG00000003640
ENSSSCG00000003646
ENSSSCG00000003662
ENSSSCG00000003663
ENSSSCG00000003666
ENSSSCG00000003672
ENSSSCG00000003679
ENSSSCG00000003697
ENSSSCG00000003702
ENSSSCG00000003708
ENSSSCG00000003709
ENSSSCG00000003711
ENSSSCG00000003722
ENSSSCG00000003732
ENSSSCG00000003733
ENSSSCG00000003736
ENSSSCG00000003737
ENSSSCG00000003738
ENSSSCG00000003744
ENSSSCG00000003754
ENSSSCG00000003762
ENSSSCG00000003763
ENSSSCG00000003773
ENSSSCG00000003788
ENSSSCG00000003789
ENSSSCG00000003794
ENSSSCG00000003799
ENSSSCG00000003801
ENSSSCG00000003803
ENSSSCG00000003805
ENSSSCG00000003807
ENSSSCG00000003825
ENSSSCG00000003826
ENSSSCG00000003839
ENSSSCG00000003845
ENSSSCG00000003846
ENSSSCG00000003848
ENSSSCG00000003861
ENSSSCG00000003875
ENSSSCG00000003876
ENSSSCG00000003888
ENSSSCG00000003900
ENSSSCG00000003905
ENSSSCG00000003908
ENSSSCG00000003909
ENSSSCG00000003913
ENSSSCG00000003920
ENSSSCG00000003921
ENSSSCG00000003926
ENSSSCG00000003928
ENSSSCG00000003929
ENSSSCG00000003931
ENSSSCG00000003949
ENSSSCG00000003954
ENSSSCG00000003955
ENSSSCG00000003957
ENSSSCG00000003958
ENSSSCG00000003965
ENSSSCG00000003972
ENSSSCG00000003987
ENSSSCG00000004012
ENSSSCG00000004013
ENSSSCG00000004039
ENSSSCG00000004040
ENSSSCG00000004041
ENSSSCG00000004046
ENSSSCG00000004052
ENSSSCG00000004053
ENSSSCG00000004064
ENSSSCG00000004074
ENSSSCG00000004075
ENSSSCG00000004077
ENSSSCG00000004078
ENSSSCG00000004087
ENSSSCG00000004090
ENSSSCG00000004092
ENSSSCG00000004096
ENSSSCG00000004109
ENSSSCG00000004138
ENSSSCG00000004139
ENSSSCG00000004142
ENSSSCG00000004154
ENSSSCG00000004159
ENSSSCG00000004164
ENSSSCG00000004167
ENSSSCG00000004170
ENSSSCG00000004179
ENSSSCG00000004180
ENSSSCG00000004181
ENSSSCG00000004184
ENSSSCG00000004191
ENSSSCG00000004192
ENSSSCG00000004195
ENSSSCG00000004222
ENSSSCG00000004232
ENSSSCG00000004236
ENSSSCG00000004244
ENSSSCG00000004245
ENSSSCG00000004252
ENSSSCG00000004254
ENSSSCG00000004270
ENSSSCG00000004280
ENSSSCG00000004291
ENSSSCG00000004309
ENSSSCG00000004330
ENSSSCG00000004332
ENSSSCG00000004336
ENSSSCG00000004344
ENSSSCG00000004354
ENSSSCG00000004369
ENSSSCG00000004371
ENSSSCG00000004402
ENSSSCG00000004404
ENSSSCG00000004420
ENSSSCG00000004458
ENSSSCG00000004464
ENSSSCG00000004465
ENSSSCG00000004466
ENSSSCG00000004475
ENSSSCG00000004484
ENSSSCG00000004493
ENSSSCG00000004503
ENSSSCG00000004507
ENSSSCG00000004511
ENSSSCG00000004518
ENSSSCG00000004528
ENSSSCG00000004530
ENSSSCG00000004531
ENSSSCG00000004540
ENSSSCG00000004548
ENSSSCG00000004554
ENSSSCG00000004565
ENSSSCG00000004572
ENSSSCG00000004576
ENSSSCG00000004584
ENSSSCG00000004588
ENSSSCG00000004597
ENSSSCG00000004603
ENSSSCG00000004612
ENSSSCG00000004614
ENSSSCG00000004620
ENSSSCG00000004621
ENSSSCG00000004622
ENSSSCG00000004623
ENSSSCG00000004629
ENSSSCG00000004630
ENSSSCG00000004638
ENSSSCG00000004643
ENSSSCG00000004644
ENSSSCG00000004657
ENSSSCG00000004670
ENSSSCG00000004671
ENSSSCG00000004675
ENSSSCG00000004676
ENSSSCG00000004678
ENSSSCG00000004687
ENSSSCG00000004694
ENSSSCG00000004699
ENSSSCG00000004702
ENSSSCG00000004713
ENSSSCG00000004714
ENSSSCG00000004732
ENSSSCG00000004733
ENSSSCG00000004736
ENSSSCG00000004755
ENSSSCG00000004758
ENSSSCG00000004759
ENSSSCG00000004766
ENSSSCG00000004776
ENSSSCG00000004781
ENSSSCG00000004782
ENSSSCG00000004789
ENSSSCG00000004806
ENSSSCG00000004807
ENSSSCG00000004830
ENSSSCG00000004840
ENSSSCG00000004843
ENSSSCG00000004858
ENSSSCG00000004859
ENSSSCG00000004869
ENSSSCG00000004898
ENSSSCG00000004902
ENSSSCG00000004921
ENSSSCG00000004926
ENSSSCG00000004928
ENSSSCG00000004956
ENSSSCG00000004969
ENSSSCG00000004974
ENSSSCG00000005008
ENSSSCG00000005020
ENSSSCG00000005027
ENSSSCG00000005045
ENSSSCG00000005056
ENSSSCG00000005067
ENSSSCG00000005095
ENSSSCG00000005102
ENSSSCG00000005109
ENSSSCG00000005110
ENSSSCG00000005122
ENSSSCG00000005125
ENSSSCG00000005130
ENSSSCG00000005163
ENSSSCG00000005164
ENSSSCG00000005167
ENSSSCG00000005180
ENSSSCG00000005186
ENSSSCG00000005203
ENSSSCG00000005211
ENSSSCG00000005233
ENSSSCG00000005250
ENSSSCG00000005268
ENSSSCG00000005286
ENSSSCG00000005296
ENSSSCG00000005298
ENSSSCG00000005312
ENSSSCG00000005314
ENSSSCG00000005340
ENSSSCG00000005344
ENSSSCG00000005358
ENSSSCG00000005369
ENSSSCG00000005373
ENSSSCG00000005375
ENSSSCG00000005385
ENSSSCG00000005398
ENSSSCG00000005403
ENSSSCG00000005420
ENSSSCG00000005423
ENSSSCG00000005437
ENSSSCG00000005438
ENSSSCG00000005439
ENSSSCG00000005449
ENSSSCG00000005454
ENSSSCG00000005457
ENSSSCG00000005458
ENSSSCG00000005463
ENSSSCG00000005475
ENSSSCG00000005484
ENSSSCG00000005485
ENSSSCG00000005487
ENSSSCG00000005488
ENSSSCG00000005490
ENSSSCG00000005494
ENSSSCG00000005510
ENSSSCG00000005578
ENSSSCG00000005584
ENSSSCG00000005588
ENSSSCG00000005591
ENSSSCG00000005601
ENSSSCG00000005609
ENSSSCG00000005619
ENSSSCG00000005620
ENSSSCG00000005629
ENSSSCG00000005631
ENSSSCG00000005636
ENSSSCG00000005638
ENSSSCG00000005641
ENSSSCG00000005651
ENSSSCG00000005657
ENSSSCG00000005664
ENSSSCG00000005699
ENSSSCG00000005705
ENSSSCG00000005706
ENSSSCG00000005707
ENSSSCG00000005710
ENSSSCG00000005724
ENSSSCG00000005730
ENSSSCG00000005737
ENSSSCG00000005742
ENSSSCG00000005751
ENSSSCG00000005780
ENSSSCG00000005781
ENSSSCG00000005785
ENSSSCG00000005893
ENSSSCG00000005896
ENSSSCG00000005902
ENSSSCG00000005905
ENSSSCG00000005916
ENSSSCG00000005917
ENSSSCG00000005922
ENSSSCG00000005923
ENSSSCG00000005939
ENSSSCG00000005944
ENSSSCG00000005962
ENSSSCG00000005965
ENSSSCG00000005967
ENSSSCG00000005979
ENSSSCG00000005981
ENSSSCG00000005983
ENSSSCG00000005995
ENSSSCG00000006002
ENSSSCG00000006003
ENSSSCG00000006023
ENSSSCG00000006031
ENSSSCG00000006034
ENSSSCG00000006040
ENSSSCG00000006043
ENSSSCG00000006056
ENSSSCG00000006060
ENSSSCG00000006064
ENSSSCG00000006073
ENSSSCG00000006095
ENSSSCG00000006099
ENSSSCG00000006105
ENSSSCG00000006106
ENSSSCG00000006140
ENSSSCG00000006143
ENSSSCG00000006161
ENSSSCG00000006164
ENSSSCG00000006169
ENSSSCG00000006173
ENSSSCG00000006185
ENSSSCG00000006233
ENSSSCG00000006235
ENSSSCG00000006250
ENSSSCG00000006262
ENSSSCG00000006264
ENSSSCG00000006266
ENSSSCG00000006273
ENSSSCG00000006277
ENSSSCG00000006286
ENSSSCG00000006287
ENSSSCG00000006290
ENSSSCG00000006329
ENSSSCG00000006333
ENSSSCG00000006344
ENSSSCG00000006348
ENSSSCG00000006352
ENSSSCG00000006353
ENSSSCG00000006369
ENSSSCG00000006372
ENSSSCG00000006374
ENSSSCG00000006378
ENSSSCG00000006379
ENSSSCG00000006380
ENSSSCG00000006381
ENSSSCG00000006382
ENSSSCG00000006383
ENSSSCG00000006393
ENSSSCG00000006394
ENSSSCG00000006396
ENSSSCG00000006399
ENSSSCG00000006403
ENSSSCG00000006418
ENSSSCG00000006450
ENSSSCG00000006452
ENSSSCG00000006453
ENSSSCG00000006462
ENSSSCG00000006465
ENSSSCG00000006466
ENSSSCG00000006472
ENSSSCG00000006475
ENSSSCG00000006477
ENSSSCG00000006478
ENSSSCG00000006479
ENSSSCG00000006481
ENSSSCG00000006489
ENSSSCG00000006495
ENSSSCG00000006503
ENSSSCG00000006506
ENSSSCG00000006511
ENSSSCG00000006521
ENSSSCG00000006525
ENSSSCG00000006526
ENSSSCG00000006533
ENSSSCG00000006543
ENSSSCG00000006545
ENSSSCG00000006546
ENSSSCG00000006547
ENSSSCG00000006550
ENSSSCG00000006551
ENSSSCG00000006555
ENSSSCG00000006567
ENSSSCG00000006569
ENSSSCG00000006572
ENSSSCG00000006579
ENSSSCG00000006587
ENSSSCG00000006595
ENSSSCG00000006604
ENSSSCG00000006605
ENSSSCG00000006609
ENSSSCG00000006618
ENSSSCG00000006620
ENSSSCG00000006625
ENSSSCG00000006627
ENSSSCG00000006639
ENSSSCG00000006644
ENSSSCG00000006651
ENSSSCG00000006664
ENSSSCG00000006665
ENSSSCG00000006666
ENSSSCG00000006687
ENSSSCG00000006688
ENSSSCG00000006709
ENSSSCG00000006713
ENSSSCG00000006734
ENSSSCG00000006742
ENSSSCG00000006743
ENSSSCG00000006758
ENSSSCG00000006761
ENSSSCG00000006764
ENSSSCG00000006767
ENSSSCG00000006771
ENSSSCG00000006776
ENSSSCG00000006780
ENSSSCG00000006788
ENSSSCG00000006791
ENSSSCG00000006802
ENSSSCG00000006803
ENSSSCG00000006808
ENSSSCG00000006810
ENSSSCG00000006811
ENSSSCG00000006812
ENSSSCG00000006836
ENSSSCG00000006846
ENSSSCG00000006852
ENSSSCG00000006923
ENSSSCG00000006932
ENSSSCG00000006935
ENSSSCG00000006940
ENSSSCG00000006948
ENSSSCG00000006956
ENSSSCG00000006957
ENSSSCG00000006966
ENSSSCG00000006969
ENSSSCG00000006987
ENSSSCG00000007002
ENSSSCG00000007005
ENSSSCG00000007052
ENSSSCG00000007056
ENSSSCG00000007061
ENSSSCG00000007067
ENSSSCG00000007072
ENSSSCG00000007078
ENSSSCG00000007079
ENSSSCG00000007082
ENSSSCG00000007083
ENSSSCG00000007084
ENSSSCG00000007093
ENSSSCG00000007099
ENSSSCG00000007110
ENSSSCG00000007112
ENSSSCG00000007114
ENSSSCG00000007116
ENSSSCG00000007121
ENSSSCG00000007130
ENSSSCG00000007135
ENSSSCG00000007139
ENSSSCG00000007147
ENSSSCG00000007149
ENSSSCG00000007155
ENSSSCG00000007157
ENSSSCG00000007179
ENSSSCG00000007200
ENSSSCG00000007231
ENSSSCG00000007235
ENSSSCG00000007236
ENSSSCG00000007238
ENSSSCG00000007243
ENSSSCG00000007248
ENSSSCG00000007268
ENSSSCG00000007305
ENSSSCG00000007324
ENSSSCG00000007331
ENSSSCG00000007350
ENSSSCG00000007351
ENSSSCG00000007366
ENSSSCG00000007367
ENSSSCG00000007370
ENSSSCG00000007373
ENSSSCG00000007382
ENSSSCG00000007384
ENSSSCG00000007385
ENSSSCG00000007391
ENSSSCG00000007423
ENSSSCG00000007427
ENSSSCG00000007436
ENSSSCG00000007437
ENSSSCG00000007448
ENSSSCG00000007456
ENSSSCG00000007470
ENSSSCG00000007473
ENSSSCG00000007476
ENSSSCG00000007477
ENSSSCG00000007484
ENSSSCG00000007486
ENSSSCG00000007491
ENSSSCG00000007493
ENSSSCG00000007495
ENSSSCG00000007497
ENSSSCG00000007499
ENSSSCG00000007501
ENSSSCG00000007505
ENSSSCG00000007507
ENSSSCG00000007508
ENSSSCG00000007515
ENSSSCG00000007523
ENSSSCG00000007526
ENSSSCG00000007527
ENSSSCG00000007538
ENSSSCG00000007539
ENSSSCG00000007547
ENSSSCG00000007549
ENSSSCG00000007554
ENSSSCG00000007557
ENSSSCG00000007558
ENSSSCG00000007563
ENSSSCG00000007564
ENSSSCG00000007565
ENSSSCG00000007574
ENSSSCG00000007578
ENSSSCG00000007585
ENSSSCG00000007586
ENSSSCG00000007589
ENSSSCG00000007593
ENSSSCG00000007602
ENSSSCG00000007603
ENSSSCG00000007605
ENSSSCG00000007644
ENSSSCG00000007645
ENSSSCG00000007648
ENSSSCG00000007650
ENSSSCG00000007656
ENSSSCG00000007665
ENSSSCG00000007671
ENSSSCG00000007673
ENSSSCG00000007674
ENSSSCG00000007678
ENSSSCG00000007703
ENSSSCG00000007705
ENSSSCG00000007718
ENSSSCG00000007719
ENSSSCG00000007722
ENSSSCG00000007751
ENSSSCG00000007754
ENSSSCG00000007765
ENSSSCG00000007773
ENSSSCG00000007782
ENSSSCG00000007789
ENSSSCG00000007790
ENSSSCG00000007807
ENSSSCG00000007813
ENSSSCG00000007849
ENSSSCG00000007850
ENSSSCG00000007862
ENSSSCG00000007868
ENSSSCG00000007872
ENSSSCG00000007873
ENSSSCG00000007899
ENSSSCG00000007909
ENSSSCG00000007915
ENSSSCG00000007926
ENSSSCG00000007927
ENSSSCG00000007933
ENSSSCG00000007951
ENSSSCG00000007956
ENSSSCG00000007957
ENSSSCG00000007961
ENSSSCG00000007963
ENSSSCG00000007967
ENSSSCG00000007973
ENSSSCG00000007975
ENSSSCG00000007977
ENSSSCG00000007989
ENSSSCG00000007991
ENSSSCG00000007993
ENSSSCG00000008010
ENSSSCG00000008011
ENSSSCG00000008013
ENSSSCG00000008021
ENSSSCG00000008026
ENSSSCG00000008032
ENSSSCG00000008034
ENSSSCG00000008036
ENSSSCG00000008041
ENSSSCG00000008054
ENSSSCG00000008062
ENSSSCG00000008063
ENSSSCG00000008073
ENSSSCG00000008089
ENSSSCG00000008090
ENSSSCG00000008122
ENSSSCG00000008125
ENSSSCG00000008126
ENSSSCG00000008135
ENSSSCG00000008147
ENSSSCG00000008155
ENSSSCG00000008157
ENSSSCG00000008159
ENSSSCG00000008162
ENSSSCG00000008166
ENSSSCG00000008171
ENSSSCG00000008202
ENSSSCG00000008213
ENSSSCG00000008217
ENSSSCG00000008229
ENSSSCG00000008239
ENSSSCG00000008241
ENSSSCG00000008261
ENSSSCG00000008265
ENSSSCG00000008270
ENSSSCG00000008282
ENSSSCG00000008284
ENSSSCG00000008289
ENSSSCG00000008292
ENSSSCG00000008299
ENSSSCG00000008302
ENSSSCG00000008308
ENSSSCG00000008311
ENSSSCG00000008335
ENSSSCG00000008337
ENSSSCG00000008344
ENSSSCG00000008357
ENSSSCG00000008372
ENSSSCG00000008388
ENSSSCG00000008397
ENSSSCG00000008402
ENSSSCG00000008413
ENSSSCG00000008441
ENSSSCG00000008446
ENSSSCG00000008449
ENSSSCG00000008453
ENSSSCG00000008465
ENSSSCG00000008496
ENSSSCG00000008501
ENSSSCG00000008504
ENSSSCG00000008522
ENSSSCG00000008535
ENSSSCG00000008536
ENSSSCG00000008544
ENSSSCG00000008552
ENSSSCG00000008563
ENSSSCG00000008570
ENSSSCG00000008572
ENSSSCG00000008590
ENSSSCG00000008595
ENSSSCG00000008601
ENSSSCG00000008603
ENSSSCG00000008613
ENSSSCG00000008618
ENSSSCG00000008624
ENSSSCG00000008625
ENSSSCG00000008642
ENSSSCG00000008645
ENSSSCG00000008646
ENSSSCG00000008647
ENSSSCG00000008648
ENSSSCG00000008650
ENSSSCG00000008651
ENSSSCG00000008664
ENSSSCG00000008665
ENSSSCG00000008677
ENSSSCG00000008703
ENSSSCG00000008709
ENSSSCG00000008712
ENSSSCG00000008720
ENSSSCG00000008722
ENSSSCG00000008727
ENSSSCG00000008729
ENSSSCG00000008730
ENSSSCG00000008738
ENSSSCG00000008741
ENSSSCG00000008747
ENSSSCG00000008749
ENSSSCG00000008765
ENSSSCG00000008768
ENSSSCG00000008770
ENSSSCG00000008772
ENSSSCG00000008794
ENSSSCG00000008796
ENSSSCG00000008802
ENSSSCG00000008813
ENSSSCG00000008823
ENSSSCG00000008824
ENSSSCG00000008832
ENSSSCG00000008841
ENSSSCG00000008844
ENSSSCG00000008853
ENSSSCG00000008867
ENSSSCG00000008898
ENSSSCG00000008930
ENSSSCG00000008944
ENSSSCG00000008950
ENSSSCG00000008952
ENSSSCG00000008953
ENSSSCG00000008957
ENSSSCG00000008959
ENSSSCG00000008963
ENSSSCG00000008965
ENSSSCG00000008970
ENSSSCG00000008972
ENSSSCG00000008978
ENSSSCG00000008985
ENSSSCG00000008993
ENSSSCG00000008995
ENSSSCG00000009001
ENSSSCG00000009002
ENSSSCG00000009004
ENSSSCG00000009011
ENSSSCG00000009018
ENSSSCG00000009031
ENSSSCG00000009060
ENSSSCG00000009092
ENSSSCG00000009098
ENSSSCG00000009100
ENSSSCG00000009115
ENSSSCG00000009120
ENSSSCG00000009122
ENSSSCG00000009129
ENSSSCG00000009135
ENSSSCG00000009136
ENSSSCG00000009152
ENSSSCG00000009169
ENSSSCG00000009178
ENSSSCG00000009182
ENSSSCG00000009188
ENSSSCG00000009216
ENSSSCG00000009217
ENSSSCG00000009228
ENSSSCG00000009232
ENSSSCG00000009240
ENSSSCG00000009245
ENSSSCG00000009250
ENSSSCG00000009301
ENSSSCG00000009313
ENSSSCG00000009320
ENSSSCG00000009347
ENSSSCG00000009351
ENSSSCG00000009354
ENSSSCG00000009357
ENSSSCG00000009377
ENSSSCG00000009378
ENSSSCG00000009385
ENSSSCG00000009393
ENSSSCG00000009396
ENSSSCG00000009417
ENSSSCG00000009428
ENSSSCG00000009434
ENSSSCG00000009442
ENSSSCG00000009445
ENSSSCG00000009446
ENSSSCG00000009448
ENSSSCG00000009457
ENSSSCG00000009475
ENSSSCG00000009488
ENSSSCG00000009513
ENSSSCG00000009517
ENSSSCG00000009520
ENSSSCG00000009521
ENSSSCG00000009535
ENSSSCG00000009542
ENSSSCG00000009562
ENSSSCG00000009564
ENSSSCG00000009565
ENSSSCG00000009566
ENSSSCG00000009584
ENSSSCG00000009592
ENSSSCG00000009593
ENSSSCG00000009601
ENSSSCG00000009605
ENSSSCG00000009609
ENSSSCG00000009612
ENSSSCG00000009613
ENSSSCG00000009617
ENSSSCG00000009620
ENSSSCG00000009630
ENSSSCG00000009633
ENSSSCG00000009642
ENSSSCG00000009648
ENSSSCG00000009649
ENSSSCG00000009650
ENSSSCG00000009653
ENSSSCG00000009659
ENSSSCG00000009661
ENSSSCG00000009665
ENSSSCG00000009667
ENSSSCG00000009670
ENSSSCG00000009671
ENSSSCG00000009704
ENSSSCG00000009716
ENSSSCG00000009722
ENSSSCG00000009738
ENSSSCG00000009745
ENSSSCG00000009753
ENSSSCG00000009758
ENSSSCG00000009761
ENSSSCG00000009764
ENSSSCG00000009765
ENSSSCG00000009781
ENSSSCG00000009786
ENSSSCG00000009794
ENSSSCG00000009798
ENSSSCG00000009817
ENSSSCG00000009833
ENSSSCG00000009845
ENSSSCG00000009855
ENSSSCG00000009859
ENSSSCG00000009865
ENSSSCG00000009867
ENSSSCG00000009873
ENSSSCG00000009874
ENSSSCG00000009875
ENSSSCG00000009881
ENSSSCG00000009892
ENSSSCG00000009893
ENSSSCG00000009895
ENSSSCG00000009919
ENSSSCG00000009921
ENSSSCG00000009927
ENSSSCG00000009929
ENSSSCG00000009944
ENSSSCG00000009958
ENSSSCG00000009959
ENSSSCG00000009966
ENSSSCG00000009979
ENSSSCG00000009995
ENSSSCG00000010006
ENSSSCG00000010009
ENSSSCG00000010012
ENSSSCG00000010046
ENSSSCG00000010054
ENSSSCG00000010055
ENSSSCG00000010056
ENSSSCG00000010057
ENSSSCG00000010060
ENSSSCG00000010086
ENSSSCG00000010089
ENSSSCG00000010093
ENSSSCG00000010102
ENSSSCG00000010106
ENSSSCG00000010113
ENSSSCG00000010122
ENSSSCG00000010139
ENSSSCG00000010163
ENSSSCG00000010170
ENSSSCG00000010176
ENSSSCG00000010177
ENSSSCG00000010199
ENSSSCG00000010210
ENSSSCG00000010214
ENSSSCG00000010219
ENSSSCG00000010224
ENSSSCG00000010232
ENSSSCG00000010240
ENSSSCG00000010245
ENSSSCG00000010252
ENSSSCG00000010259
ENSSSCG00000010276
ENSSSCG00000010293
ENSSSCG00000010298
ENSSSCG00000010322
ENSSSCG00000010334
ENSSSCG00000010336
ENSSSCG00000010337
ENSSSCG00000010342
ENSSSCG00000010348
ENSSSCG00000010352
ENSSSCG00000010369
ENSSSCG00000010374
ENSSSCG00000010375
ENSSSCG00000010376
ENSSSCG00000010381
ENSSSCG00000010402
ENSSSCG00000010431
ENSSSCG00000010444
ENSSSCG00000010448
ENSSSCG00000010449
ENSSSCG00000010451
ENSSSCG00000010452
ENSSSCG00000010454
ENSSSCG00000010457
ENSSSCG00000010471
ENSSSCG00000010475
ENSSSCG00000010478
ENSSSCG00000010479
ENSSSCG00000010480
ENSSSCG00000010493
ENSSSCG00000010496
ENSSSCG00000010505
ENSSSCG00000010506
ENSSSCG00000010514
ENSSSCG00000010527
ENSSSCG00000010529
ENSSSCG00000010536
ENSSSCG00000010538
ENSSSCG00000010543
ENSSSCG00000010544
ENSSSCG00000010546
ENSSSCG00000010561
ENSSSCG00000010573
ENSSSCG00000010575
ENSSSCG00000010577
ENSSSCG00000010580
ENSSSCG00000010584
ENSSSCG00000010591
ENSSSCG00000010593
ENSSSCG00000010595
ENSSSCG00000010597
ENSSSCG00000010601
ENSSSCG00000010613
ENSSSCG00000010629
ENSSSCG00000010638
ENSSSCG00000010647
ENSSSCG00000010655
ENSSSCG00000010657
ENSSSCG00000010665
ENSSSCG00000010686
ENSSSCG00000010698
ENSSSCG00000010706
ENSSSCG00000010724
ENSSSCG00000010727
ENSSSCG00000010733
ENSSSCG00000010739
ENSSSCG00000010752
ENSSSCG00000010764
ENSSSCG00000010770
ENSSSCG00000010771
ENSSSCG00000010772
ENSSSCG00000010787
ENSSSCG00000010814
ENSSSCG00000010831
ENSSSCG00000010837
ENSSSCG00000010865
ENSSSCG00000010868
ENSSSCG00000010879
ENSSSCG00000010885
ENSSSCG00000010888
ENSSSCG00000010896
ENSSSCG00000010911
ENSSSCG00000010912
ENSSSCG00000010915
ENSSSCG00000010922
ENSSSCG00000010926
ENSSSCG00000010948
ENSSSCG00000010949
ENSSSCG00000010959
ENSSSCG00000010971
ENSSSCG00000010992
ENSSSCG00000011002
ENSSSCG00000011014
ENSSSCG00000011020
ENSSSCG00000011026
ENSSSCG00000011030
ENSSSCG00000011037
ENSSSCG00000011038
ENSSSCG00000011039
ENSSSCG00000011040
ENSSSCG00000011046
ENSSSCG00000011047
ENSSSCG00000011056
ENSSSCG00000011060
ENSSSCG00000011065
ENSSSCG00000011069
ENSSSCG00000011074
ENSSSCG00000011076
ENSSSCG00000011080
ENSSSCG00000011087
ENSSSCG00000011090
ENSSSCG00000011102
ENSSSCG00000011131
ENSSSCG00000011133
ENSSSCG00000011147
ENSSSCG00000011158
ENSSSCG00000011160
ENSSSCG00000011176
ENSSSCG00000011195
ENSSSCG00000011207
ENSSSCG00000011230
ENSSSCG00000011239
ENSSSCG00000011241
ENSSSCG00000011246
ENSSSCG00000011251
ENSSSCG00000011264
ENSSSCG00000011280
ENSSSCG00000011298
ENSSSCG00000011309
ENSSSCG00000011316
ENSSSCG00000011318
ENSSSCG00000011322
ENSSSCG00000011324
ENSSSCG00000011327
ENSSSCG00000011330
ENSSSCG00000011334
ENSSSCG00000011349
ENSSSCG00000011357
ENSSSCG00000011358
ENSSSCG00000011360
ENSSSCG00000011362
ENSSSCG00000011376
ENSSSCG00000011384
ENSSSCG00000011389
ENSSSCG00000011393
ENSSSCG00000011397
ENSSSCG00000011408
ENSSSCG00000011416
ENSSSCG00000011420
ENSSSCG00000011423
ENSSSCG00000011426
ENSSSCG00000011436
ENSSSCG00000011451
ENSSSCG00000011465
ENSSSCG00000011470
ENSSSCG00000011471
ENSSSCG00000011543
ENSSSCG00000011548
ENSSSCG00000011563
ENSSSCG00000011570
ENSSSCG00000011579
ENSSSCG00000011600
ENSSSCG00000011610
ENSSSCG00000011618
ENSSSCG00000011624
ENSSSCG00000011625
ENSSSCG00000011630
ENSSSCG00000011635
ENSSSCG00000011640
ENSSSCG00000011641
ENSSSCG00000011643
ENSSSCG00000011683
ENSSSCG00000011712
ENSSSCG00000011713
ENSSSCG00000011717
ENSSSCG00000011723
ENSSSCG00000011730
ENSSSCG00000011731
ENSSSCG00000011736
ENSSSCG00000011743
ENSSSCG00000011748
ENSSSCG00000011761
ENSSSCG00000011793
ENSSSCG00000011799
ENSSSCG00000011800
ENSSSCG00000011802
ENSSSCG00000011806
ENSSSCG00000011809
ENSSSCG00000011828
ENSSSCG00000011859
ENSSSCG00000011862
ENSSSCG00000011874
ENSSSCG00000011876
ENSSSCG00000011877
ENSSSCG00000011878
ENSSSCG00000011890
ENSSSCG00000011899
ENSSSCG00000011905
ENSSSCG00000011936
ENSSSCG00000011946
ENSSSCG00000011947
ENSSSCG00000011951
ENSSSCG00000011953
ENSSSCG00000011972
ENSSSCG00000011977
ENSSSCG00000012004
ENSSSCG00000012006
ENSSSCG00000012026
ENSSSCG00000012034
ENSSSCG00000012040
ENSSSCG00000012053
ENSSSCG00000012056
ENSSSCG00000012065
ENSSSCG00000012066
ENSSSCG00000012074
ENSSSCG00000012075
ENSSSCG00000012076
ENSSSCG00000012077
ENSSSCG00000012083
ENSSSCG00000012104
ENSSSCG00000012117
ENSSSCG00000012118
ENSSSCG00000012130
ENSSSCG00000012132
ENSSSCG00000012133
ENSSSCG00000012155
ENSSSCG00000012161
ENSSSCG00000012167
ENSSSCG00000012233
ENSSSCG00000012254
ENSSSCG00000012272
ENSSSCG00000012278
ENSSSCG00000012286
ENSSSCG00000012288
ENSSSCG00000012293
ENSSSCG00000012300
ENSSSCG00000012305
ENSSSCG00000012306
ENSSSCG00000012307
ENSSSCG00000012308
ENSSSCG00000012367
ENSSSCG00000012375
ENSSSCG00000012377
ENSSSCG00000012380
ENSSSCG00000012386
ENSSSCG00000012394
ENSSSCG00000012397
ENSSSCG00000012402
ENSSSCG00000012426
ENSSSCG00000012479
ENSSSCG00000012487
ENSSSCG00000012490
ENSSSCG00000012491
ENSSSCG00000012492
ENSSSCG00000012493
ENSSSCG00000012549
ENSSSCG00000012557
ENSSSCG00000012561
ENSSSCG00000012618
ENSSSCG00000012620
ENSSSCG00000012627
ENSSSCG00000012655
ENSSSCG00000012656
ENSSSCG00000012661
ENSSSCG00000012678
ENSSSCG00000012705
ENSSSCG00000012724
ENSSSCG00000012733
ENSSSCG00000012741
ENSSSCG00000012768
ENSSSCG00000012785
ENSSSCG00000012787
ENSSSCG00000012789
ENSSSCG00000012793
ENSSSCG00000012812
ENSSSCG00000012824
ENSSSCG00000012832
ENSSSCG00000012835
ENSSSCG00000012844
ENSSSCG00000012845
ENSSSCG00000012848
ENSSSCG00000012851
ENSSSCG00000012852
ENSSSCG00000012853
ENSSSCG00000012870
ENSSSCG00000012871
ENSSSCG00000012880
ENSSSCG00000012882
ENSSSCG00000012883
ENSSSCG00000012886
ENSSSCG00000012889
ENSSSCG00000012890
ENSSSCG00000012893
ENSSSCG00000012906
ENSSSCG00000012909
ENSSSCG00000012915
ENSSSCG00000012933
ENSSSCG00000012941
ENSSSCG00000012942
ENSSSCG00000012950
ENSSSCG00000012952
ENSSSCG00000012959
ENSSSCG00000012964
ENSSSCG00000012967
ENSSSCG00000012968
ENSSSCG00000012974
ENSSSCG00000012975
ENSSSCG00000012978
ENSSSCG00000012981
ENSSSCG00000012982
ENSSSCG00000012983
ENSSSCG00000012986
ENSSSCG00000012993
ENSSSCG00000012994
ENSSSCG00000012997
ENSSSCG00000012998
ENSSSCG00000013003
ENSSSCG00000013008
ENSSSCG00000013018
ENSSSCG00000013020
ENSSSCG00000013024
ENSSSCG00000013027
ENSSSCG00000013031
ENSSSCG00000013034
ENSSSCG00000013041
ENSSSCG00000013042
ENSSSCG00000013044
ENSSSCG00000013048
ENSSSCG00000013054
ENSSSCG00000013057
ENSSSCG00000013066
ENSSSCG00000013067
ENSSSCG00000013073
ENSSSCG00000013078
ENSSSCG00000013079
ENSSSCG00000013092
ENSSSCG00000013093
ENSSSCG00000013100
ENSSSCG00000013105
ENSSSCG00000013106
ENSSSCG00000013114
ENSSSCG00000013119
ENSSSCG00000013124
ENSSSCG00000013132
ENSSSCG00000013162
ENSSSCG00000013170
ENSSSCG00000013172
ENSSSCG00000013175
ENSSSCG00000013231
ENSSSCG00000013237
ENSSSCG00000013252
ENSSSCG00000013261
ENSSSCG00000013263
ENSSSCG00000013266
ENSSSCG00000013270
ENSSSCG00000013273
ENSSSCG00000013276
ENSSSCG00000013278
ENSSSCG00000013296
ENSSSCG00000013297
ENSSSCG00000013300
ENSSSCG00000013307
ENSSSCG00000013313
ENSSSCG00000013332
ENSSSCG00000013341
ENSSSCG00000013349
ENSSSCG00000013352
ENSSSCG00000013363
ENSSSCG00000013374
ENSSSCG00000013376
ENSSSCG00000013382
ENSSSCG00000013408
ENSSSCG00000013411
ENSSSCG00000013417
ENSSSCG00000013418
ENSSSCG00000013420
ENSSSCG00000013421
ENSSSCG00000013425
ENSSSCG00000013432
ENSSSCG00000013433
ENSSSCG00000013434
ENSSSCG00000013439
ENSSSCG00000013440
ENSSSCG00000013448
ENSSSCG00000013461
ENSSSCG00000013462
ENSSSCG00000013469
ENSSSCG00000013471
ENSSSCG00000013473
ENSSSCG00000013474
ENSSSCG00000013476
ENSSSCG00000013490
ENSSSCG00000013495
ENSSSCG00000013497
ENSSSCG00000013498
ENSSSCG00000013501
ENSSSCG00000013505
ENSSSCG00000013506
ENSSSCG00000013509
ENSSSCG00000013512
ENSSSCG00000013513
ENSSSCG00000013517
ENSSSCG00000013527
ENSSSCG00000013530
ENSSSCG00000013536
ENSSSCG00000013538
ENSSSCG00000013545
ENSSSCG00000013551
ENSSSCG00000013553
ENSSSCG00000013556
ENSSSCG00000013583
ENSSSCG00000013586
ENSSSCG00000013598
ENSSSCG00000013599
ENSSSCG00000013605
ENSSSCG00000013606
ENSSSCG00000013607
ENSSSCG00000013609
ENSSSCG00000013610
ENSSSCG00000013617
ENSSSCG00000013632
ENSSSCG00000013642
ENSSSCG00000013650
ENSSSCG00000013654
ENSSSCG00000013655
ENSSSCG00000013658
ENSSSCG00000013664
ENSSSCG00000013665
ENSSSCG00000013730
ENSSSCG00000013732
ENSSSCG00000013733
ENSSSCG00000013735
ENSSSCG00000013753
ENSSSCG00000013754
ENSSSCG00000013758
ENSSSCG00000013759
ENSSSCG00000013764
ENSSSCG00000013765
ENSSSCG00000013766
ENSSSCG00000013767
ENSSSCG00000013769
ENSSSCG00000013772
ENSSSCG00000013829
ENSSSCG00000013831
ENSSSCG00000013832
ENSSSCG00000013833
ENSSSCG00000013834
ENSSSCG00000013850
ENSSSCG00000013853
ENSSSCG00000013860
ENSSSCG00000013862
ENSSSCG00000013868
ENSSSCG00000013876
ENSSSCG00000013885
ENSSSCG00000013886
ENSSSCG00000013888
ENSSSCG00000013890
ENSSSCG00000013894
ENSSSCG00000013932
ENSSSCG00000013940
ENSSSCG00000013989
ENSSSCG00000014007
ENSSSCG00000014027
ENSSSCG00000014053
ENSSSCG00000014054
ENSSSCG00000014055
ENSSSCG00000014056
ENSSSCG00000014063
ENSSSCG00000014072
ENSSSCG00000014091
ENSSSCG00000014093
ENSSSCG00000014097
ENSSSCG00000014099
ENSSSCG00000014124
ENSSSCG00000014127
ENSSSCG00000014140
ENSSSCG00000014156
ENSSSCG00000014157
ENSSSCG00000014168
ENSSSCG00000014169
ENSSSCG00000014171
ENSSSCG00000014182
ENSSSCG00000014213
ENSSSCG00000014214
ENSSSCG00000014221
ENSSSCG00000014231
ENSSSCG00000014232
ENSSSCG00000014233
ENSSSCG00000014238
ENSSSCG00000014248
ENSSSCG00000014272
ENSSSCG00000014275
ENSSSCG00000014277
ENSSSCG00000014284
ENSSSCG00000014286
ENSSSCG00000014287
ENSSSCG00000014293
ENSSSCG00000014294
ENSSSCG00000014303
ENSSSCG00000014326
ENSSSCG00000014336
ENSSSCG00000014349
ENSSSCG00000014351
ENSSSCG00000014362
ENSSSCG00000014368
ENSSSCG00000014369
ENSSSCG00000014374
ENSSSCG00000014377
ENSSSCG00000014387
ENSSSCG00000014389
ENSSSCG00000014391
ENSSSCG00000014395
ENSSSCG00000014399
ENSSSCG00000014408
ENSSSCG00000014412
ENSSSCG00000014415
ENSSSCG00000014428
ENSSSCG00000014433
ENSSSCG00000014436
ENSSSCG00000014438
ENSSSCG00000014441
ENSSSCG00000014447
ENSSSCG00000014448
ENSSSCG00000014450
ENSSSCG00000014555
ENSSSCG00000014561
ENSSSCG00000014565
ENSSSCG00000014567
ENSSSCG00000014568
ENSSSCG00000014570
ENSSSCG00000014580
ENSSSCG00000014599
ENSSSCG00000014618
ENSSSCG00000014630
ENSSSCG00000014633
ENSSSCG00000014670
ENSSSCG00000014672
ENSSSCG00000014779
ENSSSCG00000014780
ENSSSCG00000014789
ENSSSCG00000014790
ENSSSCG00000014796
ENSSSCG00000014823
ENSSSCG00000014835
ENSSSCG00000014853
ENSSSCG00000014854
ENSSSCG00000014860
ENSSSCG00000014861
ENSSSCG00000014869
ENSSSCG00000014871
ENSSSCG00000014872
ENSSSCG00000014874
ENSSSCG00000014876
ENSSSCG00000014880
ENSSSCG00000014892
ENSSSCG00000014897
ENSSSCG00000014898
ENSSSCG00000014924
ENSSSCG00000014950
ENSSSCG00000014976
ENSSSCG00000014977
ENSSSCG00000014983
ENSSSCG00000015001
ENSSSCG00000015002
ENSSSCG00000015009
ENSSSCG00000015010
ENSSSCG00000015015
ENSSSCG00000015021
ENSSSCG00000015036
ENSSSCG00000015051
ENSSSCG00000015082
ENSSSCG00000015085
ENSSSCG00000015086
ENSSSCG00000015093
ENSSSCG00000015098
ENSSSCG00000015099
ENSSSCG00000015101
ENSSSCG00000015106
ENSSSCG00000015111
ENSSSCG00000015113
ENSSSCG00000015117
ENSSSCG00000015131
ENSSSCG00000015136
ENSSSCG00000015138
ENSSSCG00000015193
ENSSSCG00000015199
ENSSSCG00000015202
ENSSSCG00000015203
ENSSSCG00000015205
ENSSSCG00000015212
ENSSSCG00000015215
ENSSSCG00000015217
ENSSSCG00000015234
ENSSSCG00000015235
ENSSSCG00000015238
ENSSSCG00000015246
ENSSSCG00000015276
ENSSSCG00000015277
ENSSSCG00000015281
ENSSSCG00000015282
ENSSSCG00000015285
ENSSSCG00000015290
ENSSSCG00000015301
ENSSSCG00000015302
ENSSSCG00000015316
ENSSSCG00000015322
ENSSSCG00000015350
ENSSSCG00000015373
ENSSSCG00000015390
ENSSSCG00000015395
ENSSSCG00000015396
ENSSSCG00000015398
ENSSSCG00000015407
ENSSSCG00000015411
ENSSSCG00000015425
ENSSSCG00000015426
ENSSSCG00000015433
ENSSSCG00000015442
ENSSSCG00000015469
ENSSSCG00000015493
ENSSSCG00000015496
ENSSSCG00000015507
ENSSSCG00000015508
ENSSSCG00000015513
ENSSSCG00000015515
ENSSSCG00000015519
ENSSSCG00000015525
ENSSSCG00000015527
ENSSSCG00000015528
ENSSSCG00000015536
ENSSSCG00000015540
ENSSSCG00000015541
ENSSSCG00000015543
ENSSSCG00000015549
ENSSSCG00000015550
ENSSSCG00000015556
ENSSSCG00000015559
ENSSSCG00000015561
ENSSSCG00000015579
ENSSSCG00000015581
ENSSSCG00000015584
ENSSSCG00000015590
ENSSSCG00000015595
ENSSSCG00000015598
ENSSSCG00000015600
ENSSSCG00000015604
ENSSSCG00000015610
ENSSSCG00000015612
ENSSSCG00000015617
ENSSSCG00000015638
ENSSSCG00000015652
ENSSSCG00000015657
ENSSSCG00000015659
ENSSSCG00000015662
ENSSSCG00000015677
ENSSSCG00000015691
ENSSSCG00000015696
ENSSSCG00000015713
ENSSSCG00000015717
ENSSSCG00000015733
ENSSSCG00000015746
ENSSSCG00000015748
ENSSSCG00000015756
ENSSSCG00000015770
ENSSSCG00000015771
ENSSSCG00000015781
ENSSSCG00000015782
[truncated: 10,112 more rows]
