# Supplementary material for: LncRNA TCONS_00323213 Promotes Myogenic Differentiation by Interacting with PKNOX2 to Upregulate MyoG in Porcine Satellite Cells
Source: Int J Mol Sci. 2023 Apr 5;24(7):6773. doi: 10.3390/ijms24076773 (PMC10094759; doi:10.3390/ijms24076773)
Supplement: Supplementary file 1 [file ijms-24-06773-s001.zip › Table S3.xlsx]

## Sheet: Sheet1
chr
1	66232181	66346575	COQ3	ENSSSCG00000004349
1	225929109	226109469	TMC1	ENSSSCG00000005266
1	182203309	182261516	GPR137C	ENSSSCG00000005036
1	234277843	234370593	TLE1	ENSSSCG00000005291
1	50403361	50498332	COL9A1	ENSSSCG00000004274
1	48886491	49619769	ADGRB3	ENSSSCG00000004270
1	167154660	167231039	PAQR5	ENSSSCG00000004968
1	164998103	165124449	SMAD3	ENSSSCG00000004952
1	165127994	165192924	AAGAB	ENSSSCG00000004951
1	176770071	177593876	MDGA2	ENSSSCG00000005002
1	166465953	166608363	CORO2B	ENSSSCG00000004962
1	168544421	168700891	LRRC49	ENSSSCG00000004976
1	77585439	77810581	FYN	ENSSSCG00000004421
1	72552922	72763546	CRYBG1	ENSSSCG00000004371
1	16840533	17138392	UST	ENSSSCG00000028974
1	11445956	11501979	NOX3	ENSSSCG00000004068
1	256825486	257740977	ASTN2	ENSSSCG00000005502
1	97610694	98015089	ZBTB7C	ENSSSCG00000028076
1	121273043	121307075	USP50	ENSSSCG00000004638
1	243225924	243254446	RNF20	ENSSSCG00000005399
1	242682812	242970615	PLPPR1	ENSSSCG00000005393
1	236341261	236345962	TESK1	ENSSSCG00000005310
1	2829411	3392651	PDE10A	ENSSSCG00000004027
1	82997993	83003528	RWDD2A	ENSSSCG00000029129
1	83003604	83029897	PGM3	ENSSSCG00000004456
1	83973582	84070554	IBTK	ENSSSCG00000004460
1	82541018	82698633	SNAP91	ENSSSCG00000004453
1	57374055	57424061	RRAGD	ENSSSCG00000004318
1	53838189	53867254	TBX18	ENSSSCG00000004290
1	57899808	58281430	BACH2	ENSSSCG00000004332
1	250680942	251190244	PALM2AKAP2	ENSSSCG00000033120
1	223384827	223548420	MAMDC2	ENSSSCG00000030655
1	216660041	216792724	CD274	ENSSSCG00000005211
1	216692047	216739722	PLGRKT	ENSSSCG00000005212
1	34693368	35258699	PTPRK	ENSSSCG00000004209
1	106036029	106411724	WDR7	ENSSSCG00000004538
1	188335384	188511096	DAAM1	ENSSSCG00000005078
1	137387825	137691058	IGF1R	ENSSSCG00000030560
1	109208672	109584727	TLN2	ENSSSCG00000024088
1	129374613	129458686	EHD4	ENSSSCG00000020666
1	193911965	194264354	SYNE2	ENSSSCG00000005110
1	128893971	128957305	ZNF106	ENSSSCG00000004725
1	123481369	123571630	SLC12A1	ENSSSCG00000004659
1	270761668	270906708	ABL1	ENSSSCG00000005706
1	270918251	270956347	FIBCD1	ENSSSCG00000005707
1	127835622	127852339	STRC	ENSSSCG00000004702
1	127916644	127936955	MAP1A	ENSSSCG00000004705
13	179225419	179308266	gene_sourceensembl	ENSSSCG00000012006
13	179825281	179915177	NRIP1	ENSSSCG00000021038
13	45401127	45498180	ATXN7	ENSSSCG00000011493
13	63318171	64203173	GRM7	ENSSSCG00000023891
13	69464795	69576946	NR2C2	ENSSSCG00000011594
13	106308394	106343518	SERPINI2	ENSSSCG00000011737
13	109643895	110052236	TNIK	ENSSSCG00000028905
13	95959378	96375856	KCNAB1	ENSSSCG00000025810
13	167807263	167895736	ZNF654	ENSSSCG00000036885
13	166592493	166942767	EPHA3	ENSSSCG00000026130
13	74180198	74555928	TMEM108	ENSSSCG00000011635
13	60370351	60916325	gene_sourceensembl	ENSSSCG00000041465
13	61068126	61398912	ITPR1	ENSSSCG00000023437
13	206111353	206127738	gene_sourceensembl	ENSSSCG00000021991
13	89221157	89259792	GYG1	ENSSSCG00000011698
13	148577909	148706809	gene_sourceensembl	ENSSSCG00000030335
13	202962664	202979902	GET1	ENSSSCG00000037381
13	14970324	16462743	RBMS3	ENSSSCG00000036381
13	200707866	200812436	TTC3	ENSSSCG00000012062
13	17651165	18031498	OSBPL10	ENSSSCG00000011230
13	127414958	127572163	P3H2	ENSSSCG00000011813
13	113236156	114208075	NAALADL2	ENSSSCG00000023871
13	138754789	138847245	GOLGB1	ENSSSCG00000011882
13	25774250	25935828	TRAK1	ENSSSCG00000011278
13	37388517	38367504	ERC2	ENSSSCG00000024417
13	38492472	38557193	TASOR	ENSSSCG00000024201
13	137296883	137398628	PDIA5	ENSSSCG00000011870
13	125401817	125408789	gene_sourceensembl	ENSSSCG00000060575
13	140136158	140369569	GSK3B	ENSSSCG00000011889
6	22923781	23279241	CDH8	ENSSSCG00000040687
6	27450632	27540118	TERB1	ENSSSCG00000035639
6	27565450	27575455	PDP2	ENSSSCG00000036067
6	28469505	28489005	NUTF2	ENSSSCG00000030295
6	136204374	136390995	ST6GALNAC5	ENSSSCG00000033425
6	779366	853822	CBFA2T3	ENSSSCG00000002648
6	636377	652165	CDH15	ENSSSCG00000002642
6	4642764	4653487	OSGIN1	ENSSSCG00000032115
6	4808255	5832415	CDH13	ENSSSCG00000002684
6	116100372	116325133	GAREM1	ENSSSCG00000003731
6	6292707	6360633	HSD17B2	ENSSSCG00000038221
6	92880303	93128569	GRIK3	ENSSSCG00000003640
6	91234815	91237971	TMEM35B	ENSSSCG00000032660
6	91455789	91623810	ZMYM4	ENSSSCG00000003627
6	99350303	100092883	PTPRM	ENSSSCG00000028805
6	63969440	63974286	TMEM52	ENSSSCG00000028530
6	169999792	170189353	SCMH1	ENSSSCG00000003971
6	67455277	67463399	THAP3	ENSSSCG00000036876
6	166666138	166910646	RNF220	ENSSSCG00000037341
6	34059081	34121264	CYLD	ENSSSCG00000040286
6	31747606	31758279	AKTIP	ENSSSCG00000026181
6	147429056	147567182	JAK1	ENSSSCG00000003809
6	49573150	49581983	gene_sourceensembl	ENSSSCG00000059920
6	47643566	47657833	HNRNPL	ENSSSCG00000035570
6	42334736	42414830	DPY19L3	ENSSSCG00000022521
6	105667366	105788665	CLUL1	ENSSSCG00000039398
6	101816967	101873206	AKAIN1	ENSSSCG00000056207
6	102642677	103199837	DLGAP1	ENSSSCG00000003690
6	18937677	19036820	NLRC5	ENSSSCG00000039751
6	19046795	19096107	CPNE2	ENSSSCG00000021519
6	53423563	53443224	EHD2	ENSSSCG00000023371
6	12367758	12404818	BCAR1	ENSSSCG00000028878
6	12952253	12994052	RFWD3	ENSSSCG00000002715
6	107075480	107079953	gene_sourceensembl	ENSSSCG00000042186
6	83265420	83280250	MTFR1L	ENSSSCG00000003553
6	59565033	59570489	UBE2S	ENSSSCG00000035344
6	19936691	19942566	gene_sourceensembl	ENSSSCG00000052747
6	19938207	19943499	gene_sourceensembl	ENSSSCG00000052748
6	71286989	71412888	MTOR	ENSSSCG00000003413
6	84880035	84910381	FAM76A	ENSSSCG00000027894
6	52294535	52318003	CCDC61	ENSSSCG00000003100
6	77780682	77912617	CAPZB	ENSSSCG00000003493
6	84735281	84802120	gene_sourceensembl	ENSSSCG00000047147
6	57144107	57180662	gene_sourceensembl	ENSSSCG00000045482
6	57156691	57180662	gene_sourceensembl	ENSSSCG00000055505
6	54714157	54732574	PRMT1	ENSSSCG00000003189
6	79408326	79466152	ECE1	ENSSSCG00000003513
6	54052050	54057877	MAMSTR	ENSSSCG00000003143
6	49560303	49562744	gene_sourceensembl	ENSSSCG00000059693
6	51256033	51265351	BCL3	ENSSSCG00000027426
2	97632419	97648137	MBLAC2	ENSSSCG00000014152
2	126349973	126507863	SNX24	ENSSSCG00000039373
2	130189556	130401077	MEGF10	ENSSSCG00000032877
2	49028923	49083590	AMPD3	ENSSSCG00000022492
2	42081541	42311548	PLEKHA7	ENSSSCG00000013382
2	42453681	43068325	SOX6	ENSSSCG00000034191
2	140878070	141118059	SIL1	ENSSSCG00000024189
2	150136011	150159639	gene_sourceensembl	ENSSSCG00000042596
2	25276859	25378448	TRIM44	ENSSSCG00000013295
2	69365012	69399081	SLC44A2	ENSSSCG00000013639
2	65166299	65173091	gene_sourceensembl	ENSSSCG00000045290
2	65514509	65871182	CACNA1A	ENSSSCG00000013754
2	119004445	119009345	gene_sourceensembl	ENSSSCG00000062580
2	119479189	119652531	gene_sourceensembl	ENSSSCG00000041901
2	84996716	85236130	SV2C	ENSSSCG00000034062
2	69568354	69576066	TMED1	ENSSSCG00000038623
2	69896120	69924919	KANK2	ENSSSCG00000039194
2	58753371	58801832	SLC25A42	ENSSSCG00000013927
2	58796665	58801826	gene_sourceensembl	ENSSSCG00000044637
2	17177964	17263880	PRDM11	ENSSSCG00000013276
2	69129765	69143042	RAVER1	ENSSSCG00000013650
2	80527446	80544828	F12	ENSSSCG00000031274
2	17750660	17803126	CD82	ENSSSCG00000029521
2	13154338	13209250	CTNND1	ENSSSCG00000013174
2	75492233	75501542	TLE5	ENSSSCG00000032265
2	14840410	14891677	NUP160	ENSSSCG00000013223
2	12495558	12531633	ZFP91	ENSSSCG00000013155
2	7939125	8088595	MACROD1	ENSSSCG00000013043
2	8892089	8919072	SLC3A2	ENSSSCG00000022404
2	74759004	74775330	DAPK3	ENSSSCG00000032170
2	5518517	5587797	PC	ENSSSCG00000012926
2	73130403	73137916	NDUFA11	ENSSSCG00000027307
2	7298208	7321576	EHD1	ENSSSCG00000013017
2	6757635	6793676	gene_sourceensembl	ENSSSCG00000041050
14	97558533	98793010	PRKG1	ENSSSCG00000010429
14	100867733	100886713	ACTA2	ENSSSCG00000010447
14	11064492	11194192	PTK2B	ENSSSCG00000009664
14	13335420	13768423	MSRA	ENSSSCG00000009684
14	63416159	64194128	gene_sourceensembl	ENSSSCG00000010212
14	61644970	61667950	gene_sourceensembl	ENSSSCG00000010203
14	38683597	38773186	TPCN1	ENSSSCG00000009879
14	69195961	70938204	CTNNA3	ENSSSCG00000036480
14	32311188	32587203	CUX2	ENSSSCG00000009831
14	33224397	33276683	TMEM233	ENSSSCG00000059472
14	30793524	30822127	PSMD9	ENSSSCG00000036483
14	30886075	30894855	gene_sourceensembl	ENSSSCG00000063011
14	2398462	2546342	AUH	ENSSSCG00000009591
14	74734189	74887763	PSAP	ENSSSCG00000010281
14	74850931	74891520	CHST3	ENSSSCG00000023662
14	7435867	7540704	LOXL2	ENSSSCG00000033608
14	75726364	75754331	OIT3	ENSSSCG00000010293
14	76248841	76305328	PPP3CB	ENSSSCG00000010301
14	56237670	56250924	gene_sourceensembl	ENSSSCG00000043646
14	56240849	56268062	gene_sourceensembl	ENSSSCG00000044931
14	77602871	77643114	DUSP29	ENSSSCG00000010317
14	77636149	77737654	SAMD8	ENSSSCG00000010319
14	77957851	79051455	LRMDA	ENSSSCG00000034308
14	138819848	138935462	EBF3	ENSSSCG00000010757
14	139013253	139050019	C10orf143	ENSSSCG00000040426
14	42882154	42974741	SGSM1	ENSSSCG00000009951
14	46875050	47023487	MTMR3	ENSSSCG00000009994
14	50082896	50165513	MAPK1	ENSSSCG00000010081
14	40286512	40286652	U4	ENSSSCG00000052143
14	113245502	113379471	GBF1	ENSSSCG00000010579
14	30028566	30066257	CCDC62	ENSSSCG00000009787
14	113636832	113652372	TRIM8	ENSSSCG00000038856
14	113737763	113800555	WBP1L	ENSSSCG00000029594
14	115217879	115251435	GSTO2	ENSSSCG00000030271
14	115285979	115410481	CFAP58	ENSSSCG00000010614
15	32600234	33267312	DLGAP2	ENSSSCG00000015746
15	37455551	37673633	MCPH1	ENSSSCG00000015754
15	37544707	37599041	ANGPT2	ENSSSCG00000015753
15	33766479	34025424	gene_sourceensembl	ENSSSCG00000048555
15	26881597	27740038	CNTNAP5	ENSSSCG00000015726
15	118295119	118335835	PECR	ENSSSCG00000022758
15	118627467	118688397	SMARCAL1	ENSSSCG00000035501
15	113974437	115096565	ERBB4	ENSSSCG00000016160
15	121288957	121294853	TUBA4A	ENSSSCG00000016216
15	128346373	128469213	RHBDD1	ENSSSCG00000016243
15	63619762	63728633	GPD2	ENSSSCG00000015872
15	47730506	47861057	gene_sourceensembl	ENSSSCG00000015814
15	48136363	48241815	NSD3	ENSSSCG00000015820
15	186434	459856	CACNB4	ENSSSCG00000029073
15	14088999	15046042	THSD7B	ENSSSCG00000040172
15	136828217	136838053	COPS8	ENSSSCG00000016323
15	135441906	135993311	AGAP1	ENSSSCG00000016317
15	138381635	138614301	HDAC4	ENSSSCG00000024777
15	53966986	54094587	WRN	ENSSSCG00000015840
15	57618993	57623947	gene_sourceensembl	ENSSSCG00000061354
15	95507863	95513220	gene_sourceensembl	ENSSSCG00000042348
15	73422267	73741134	XIRP2	ENSSSCG00000015917
9	85422317	85710750	CRPPA	ENSSSCG00000015358
9	75018067	75203447	ASB4	ENSSSCG00000015333
9	53309260	53358384	FAM118B	ENSSSCG00000025806
9	53400755	53437548	DCPS	ENSSSCG00000015231
9	53445591	53486010	ST3GAL4	ENSSSCG00000015232
9	113782284	113787340	MYOG	ENSSSCG00000034654
9	113835921	113872365	ADORA1	ENSSSCG00000021059
9	78217213	78334077	GLCCI1	ENSSSCG00000015345
9	120420942	120724218	RALGPS2	ENSSSCG00000015523
9	70499873	71310250	CDK14	ENSSSCG00000015307
9	117064187	117123126	CACYBP	ENSSSCG00000015504
9	117137250	117243815	TNN	ENSSSCG00000015507
9	117373545	117771224	TNR	ENSSSCG00000015508
9	23170850	23264633	gene_sourceensembl	ENSSSCG00000061267
9	21917735	22436063	GRM5	ENSSSCG00000029865
9	92104848	92272211	IGF2BP3	ENSSSCG00000036695
9	104275423	104827405	LHFPL3	ENSSSCG00000035554
9	100847013	102170004	MAGI2	ENSSSCG00000031780
9	6066617	6270575	STIM1	ENSSSCG00000014792
9	123006195	123315319	CACNA1E	ENSSSCG00000015543
9	108631256	108676183	STARD3NL	ENSSSCG00000024028
9	45187	104736	ZNF143	ENSSSCG00000022070
9	130255308	130435315	RPS6KC1	ENSSSCG00000015586
9	7852357	8071812	FAM168A	ENSSSCG00000039996
9	125908864	125983029	EDEM3	ENSSSCG00000015566
9	131960480	132334953	KCNH1	ENSSSCG00000040650
9	132347037	132666873	HHAT	ENSSSCG00000015607
9	6793069	6808028	INPPL1	ENSSSCG00000014811
9	7136644	7227964	PDE2A	ENSSSCG00000029388
9	46146525	46174589	BCL9L	ENSSSCG00000015099
9	17576135	19545916	DLG2	ENSSSCG00000014904
9	1002247	1009678	gene_sourceensembl	ENSSSCG00000053031
8	15211917	16346786	KCNIP4	ENSSSCG00000023934
8	12759641	12807163	NCAPG	ENSSSCG00000008747
8	86088668	86332913	RNF150	ENSSSCG00000009053
8	84812256	85018401	gene_sourceensembl	ENSSSCG00000054996
8	104677583	104873791	SYNPO2	ENSSSCG00000009111
8	130021643	130327729	FAM13A	ENSSSCG00000026196
8	130346214	130470247	HERC3	ENSSSCG00000009208
8	80312234	80668412	NR3C2	ENSSSCG00000037766
8	112539189	112651261	MCUB	ENSSSCG00000009141
8	30552400	30635867	RFC1	ENSSSCG00000008788
8	29307685	29342861	PGM2	ENSSSCG00000008773
8	100450266	100863446	SPRY1	ENSSSCG00000009083
8	40967493	41021441	PDGFRA	ENSSSCG00000008841
8	45578002	45808748	PDGFC	ENSSSCG00000024960
8	47133703	47210334	TMEM144	ENSSSCG00000008874
8	6210478	6367496	SLC2A9	ENSSSCG00000031700
3	68598249	68613631	RTKN	ENSSSCG00000008281
3	93457625	93591941	TTC7A	ENSSSCG00000008434
3	117773405	117777574	RHOB	ENSSSCG00000043781
3	100557016	100597671	THUMPD2	ENSSSCG00000008470
3	101617526	101753125	gene_sourceensembl	ENSSSCG00000008486
3	101753292	101802062	HNRNPLL	ENSSSCG00000020878
3	53149196	53289790	TBC1D8	ENSSSCG00000008169
3	55711031	55834367	INPP4A	ENSSSCG00000008190
3	58964550	59001145	ATOH8	ENSSSCG00000008230
3	30584951	31133317	SNX29	ENSSSCG00000037232
3	10416475	10578366	HIP1	ENSSSCG00000007700
3	16385006	16393841	KCTD7	ENSSSCG00000040985
3	38103923	38303538	ADCY9	ENSSSCG00000007950
3	15487522	16160641	gene_sourceensembl	ENSSSCG00000007733
3	9670815	9695629	SH2B2	ENSSSCG00000007682
3	4082216	4090356	ACTB	ENSSSCG00000007585
3	4134177	4143286	FSCN1	ENSSSCG00000007586
3	4158450	4329378	RNF216	ENSSSCG00000021285
3	6343831	6355213	PDAP1	ENSSSCG00000033450
3	110605923	110741130	PLB1	ENSSSCG00000034756
3	106300750	106724737	LTBP1	ENSSSCG00000008510
3	102538586	102567796	CDC42EP3	ENSSSCG00000021359
3	45906673	46000115	KCNIP3	ENSSSCG00000008119
3	41009717	41013018	RPUSD1	ENSSSCG00000008000
3	44085397	44148494	ZC3H6	ENSSSCG00000008096
3	41540656	41548290	MPG	ENSSSCG00000007982
3	20544232	21056195	HS3ST4	ENSSSCG00000036837
3	89803519	90382034	NRXN1	ENSSSCG00000026180
3	21995231	22383264	PRKCB	ENSSSCG00000033674
3	28968215	29167637	MRTFB	ENSSSCG00000039171
3	77975441	78031703	UGP2	ENSSSCG00000008368
4	16310314	16341433	DERL1	ENSSSCG00000056684
4	12455122	12461078	MYC	ENSSSCG00000005965
4	43707907	43793407	TRIQK	ENSSSCG00000037733
4	43043571	43046841	gene_sourceensembl	ENSSSCG00000060461
4	68484053	68486121	CRH	ENSSSCG00000006215
4	12168472	12175089	gene_sourceensembl	ENSSSCG00000042468
4	3025928	3028725	CHRAC1	ENSSSCG00000005933
4	93581598	93616983	MEF2D	ENSSSCG00000006482
4	99970394	100058164	BCL9	ENSSSCG00000006698
4	93899019	93926320	LMNA	ENSSSCG00000006496
4	95427943	95449188	ATP8B2	ENSSSCG00000006550
4	95542473	95572938	gene_sourceensembl	ENSSSCG00000006556
4	95705220	95711729	RAB13	ENSSSCG00000006564
4	98107360	98122347	SEMA6C	ENSSSCG00000006635
4	107959571	108011611	CTTNBP2NL	ENSSSCG00000006781
4	100981636	101150195	NOTCH2	ENSSSCG00000006709
4	89738444	89751576	gene_sourceensembl	ENSSSCG00000006376
4	84838802	84919236	UCK2	ENSSSCG00000039867
4	80857344	80877566	NTMT2	ENSSSCG00000006281
4	81911561	81991840	ATP1B1	ENSSSCG00000006296
4	82844941	82905534	GPR161	ENSSSCG00000006302
4	83235714	83316405	MPZL1	ENSSSCG00000006306
X	96950288	97027050	WDR44	ENSSSCG00000035488
X	124294856	124452182	SLC6A8	ENSSSCG00000012771
X	124528585	124537575	IDH3G	ENSSSCG00000012783
X	124301713	124357653	ATP2B3	ENSSSCG00000012769
X	34826163	35336591	gene_sourceensembl	ENSSSCG00000051065
X	76149260	76184095	FAM133A	ENSSSCG00000031033
X	76147202	76149852	NAP1L3	ENSSSCG00000012504
X	58210192	58450573	HDAC8	ENSSSCG00000021200
X	106617753	106661108	ELF4	ENSSSCG00000012656
X	83213947	83224391	ARMCX2	ENSSSCG00000012510
X	85347857	86463507	IL1RAPL2	ENSSSCG00000012545
X	24409327	25806680	IL1RAPL1	ENSSSCG00000012196
X	26365027	26384760	TASL	ENSSSCG00000012201
X	12183796	12224964	CLTRN	ENSSSCG00000035893
X	12224159	12238702	gene_sourceensembl	ENSSSCG00000054041
X	12295446	12332275	gene_sourceensembl	ENSSSCG00000012141
7	111039633	111451893	FOXN3	ENSSSCG00000002429
7	11359230	11601401	JARID2	ENSSSCG00000001061
7	46084662	46104375	MCM3	ENSSSCG00000025488
7	46239230	46348667	EFHC1	ENSSSCG00000002620
7	46323077	46361305	TRAM2	ENSSSCG00000038401
7	95022924	95167107	SIPA1L1	ENSSSCG00000002332
7	75021755	75028875	RABGGTA	ENSSSCG00000001992
7	93643618	93796917	SLC8A3	ENSSSCG00000002315
7	65928075	66800991	NPAS3	ENSSSCG00000001964
7	69527811	69872863	PRKD1	ENSSSCG00000001975
7	64083289	64123857	BRMS1L	ENSSSCG00000001947
7	121238268	121384292	WDR25	ENSSSCG00000002517
7	91592424	92345294	RAD51B	ENSSSCG00000028877
7	75140207	75158905	RNF31	ENSSSCG00000002003
7	75153965	75157870	PSME2	ENSSSCG00000002004
7	66915881	67375177	AKAP6	ENSSSCG00000024517
7	68393285	68471722	AP4S1	ENSSSCG00000001972
7	68470877	68577273	STRN3	ENSSSCG00000040657
7	97052417	97122966	MIDEAS	ENSSSCG00000002350
7	113423632	113512198	FBLN5	ENSSSCG00000002444
7	76110951	76124989	PRMT5	ENSSSCG00000030045
7	97745396	97852502	LTBP2	ENSSSCG00000002368
7	114237145	114273915	GOLGA5	ENSSSCG00000002455
7	752592	1285550	GMDS	ENSSSCG00000000994
7	195083	341442	EXOC2	ENSSSCG00000000985
7	7462242	7473800	gene_sourceensembl	ENSSSCG00000001038
7	33720014	34124458	BTBD9	ENSSSCG00000037507
7	23829791	23832770	LY6G6C	ENSSSCG00000036566
7	23838996	23842516	DDAH2	ENSSSCG00000038514
7	52731224	52793927	ZNF592	ENSSSCG00000034070
7	26561359	26793724	MLIP	ENSSSCG00000001485
7	27390918	27895597	KHDRBS2	ENSSSCG00000001490
7	58174158	58175807	gene_sourceensembl	ENSSSCG00000041171
7	28812252	29300152	DST	ENSSSCG00000001499
7	20821091	20829493	HIST1H2BD	ENSSSCG00000021411
7	29624230	29639140	VPS52	ENSSSCG00000001501
5	57349382	57462804	RERG	ENSSSCG00000000602
5	73498730	73697953	PPHLN1	ENSSSCG00000000793
5	19586746	19610362	ITGA5	ENSSSCG00000000293
5	10149068	10156023	LGALS1	ENSSSCG00000033854
5	11264645	11283395	gene_sourceensembl	ENSSSCG00000000144
5	11633541	11903094	RBFOX2	ENSSSCG00000000152
5	103013806	103368021	NAV3	ENSSSCG00000029249
5	90168242	90257241	EEA1	ENSSSCG00000044340
5	3637111	3798201	ATXN10	ENSSSCG00000024864
5	63572065	63599525	CLSTN3	ENSSSCG00000000672
5	9683660	9696023	MAFF	ENSSSCG00000030165
5	6562011	6567647	NDUFA6	ENSSSCG00000000045
5	21199422	21261876	SARNP	ENSSSCG00000000364
5	21147767	21160735	BLOC1S1	ENSSSCG00000000359
5	45138057	45525650	CCDC91	ENSSSCG00000024232
5	21495944	21504095	gene_sourceensembl	ENSSSCG00000000377
16	53843252	54248638	DOCK2	ENSSSCG00000017008
16	37897302	39306364	PDE4D	ENSSSCG00000016929
16	39958610	40023573	gene_sourceensembl	ENSSSCG00000051151
16	24333033	24507740	FYB1	ENSSSCG00000016855
16	79237061	79248500	CLPTM1L	ENSSSCG00000017119
16	71857258	71913723	ANXA6	ENSSSCG00000017089
16	71357586	71381161	SPARC	ENSSSCG00000017082
11	78951019	79027900	RASA3	ENSSSCG00000009567
11	20688596	20906608	LRCH1	ENSSSCG00000009408
11	22381937	22449213	gene_sourceensembl	ENSSSCG00000046928
11	70042232	70246968	ITGBL1	ENSSSCG00000009526
11	12313210	12374645	SPART	ENSSSCG00000024635
11	65307168	65476544	UGGT2	ENSSSCG00000009502
11	13298992	13517502	TRPC4	ENSSSCG00000009362
11	67144645	67457548	FARP1	ENSSSCG00000026863
11	67764011	68053042	DOCK9	ENSSSCG00000022112
11	18871775	18927068	gene_sourceensembl	ENSSSCG00000046385
11	51862541	51866983	gene_sourceensembl	ENSSSCG00000051611
11	3277951	3793881	ATP8A2	ENSSSCG00000035421
11	2670000	2790727	MIPEP	ENSSSCG00000009290
11	7474385	7476826	gene_sourceensembl	ENSSSCG00000061444
10	8305539	8390341	TGFB2	ENSSSCG00000010816
10	8946487	9062412	LYPLAL1	ENSSSCG00000010817
10	17282939	17355061	CATSPERE	ENSSSCG00000035850
10	16191156	16441815	SDCCAG8	ENSSSCG00000035136
10	68621828	68707891	gene_sourceensembl	ENSSSCG00000011162
10	65275532	65303223	ASB13	ENSSSCG00000011145
10	53602936	53958047	NEBL	ENSSSCG00000011090
10	55842696	56038228	gene_sourceensembl	ENSSSCG00000032896
10	56280665	56430777	NRP1	ENSSSCG00000011102
10	23885798	24102340	NAV1	ENSSSCG00000010915
17	14746997	14761995	CHGB	ENSSSCG00000039779
17	12758536	13264174	PSD3	ENSSSCG00000007034
17	47994656	48017560	DNTTIP1	ENSSSCG00000007422
17	48966814	49243739	EYA2	ENSSSCG00000007453
17	22635284	24683549	MACROD2	ENSSSCG00000030112
17	22940492	22954424	FLRT3	ENSSSCG00000007079
17	24882142	25186703	KIF16B	ENSSSCG00000007080
17	50631092	50732243	ARFGEF2	ENSSSCG00000007460
17	54920712	55039346	BCAS1	ENSSSCG00000007485
17	51704241	51707307	gene_sourceensembl	ENSSSCG00000063332
17	32284752	32437839	DNAAF9	ENSSSCG00000007155
17	36915953	36946187	SNTA1	ENSSSCG00000063004
17	38810522	38867203	CEP250	ENSSSCG00000021138
12	31277487	31472792	STXBP4	ENSSSCG00000017602
12	25792630	25860595	SPOP	ENSSSCG00000020796
12	23037810	23060490	CACNB1	ENSSSCG00000017510
12	27979331	28615807	CA10	ENSSSCG00000023169
12	26356777	26371600	SGCA	ENSSSCG00000017583
12	24804647	24809937	HOXB3	ENSSSCG00000017534
12	24808945	24827643	gene_sourceensembl	ENSSSCG00000047569
12	61077631	61186002	gene_sourceensembl	ENSSSCG00000036812
12	46709880	46895808	ABR	ENSSSCG00000017804
12	48806772	49018114	RAP1GAP2	ENSSSCG00000034858
12	47358513	47385120	gene_sourceensembl	ENSSSCG00000060696
12	11751937	11843055	ARSG	ENSSSCG00000017261
12	18272797	18281595	ACBD4	ENSSSCG00000017337
12	15319593	15350976	DCAF7	ENSSSCG00000017294
12	16903450	17096916	KANSL1	ENSSSCG00000017310
12	58679775	58707925	PMP22	ENSSSCG00000037832
12	60466197	60475056	MIEF2	ENSSSCG00000037151
12	52992843	53086744	DNAH2	ENSSSCG00000017963
12	8243880	8423906	gene_sourceensembl	ENSSSCG00000033537
18	42820921	42902867	PLEKHA8	ENSSSCG00000016682
18	43844942	44261031	CREB5	ENSSSCG00000016690
18	20261476	20653590	SND1	ENSSSCG00000016590
18	16427673	16973768	PLXNA4	ENSSSCG00000021562
18	18998930	19142628	NRF1	ENSSSCG00000016566
18	19209051	19255676	STRIP2	ENSSSCG00000016567
18	18485478	18507346	CPA5	ENSSSCG00000054055
18	1444739	1499887	DNAJB6	ENSSSCG00000033272
18	5958506	5989114	SMARCD3	ENSSSCG00000016435
18	3148483	4054118	DPP6	ENSSSCG00000016423
18	5475077	5744657	PRKAG2	ENSSSCG00000016432
Y	9374899	9552306	gene_sourceensembl	ENSSSCG00000027046
1	66350969	66381454	PNISR	ENSSSCG00000037594
1	182102736	182203048	TXNDC16	ENSSSCG00000035934
1	182203309	182261516	GPR137C	ENSSSCG00000005036
1	67214337	67294397	SIM1	ENSSSCG00000004357
1	179604921	179633156	KLHDC2	ENSSSCG00000005009
1	180068973	180081412	DMAC2L	ENSSSCG00000031354
1	167808510	167855911	TLE3	ENSSSCG00000004971
1	164998103	165124449	SMAD3	ENSSSCG00000004952
1	165458258	165740297	MAP2K5	ENSSSCG00000004955
1	144930370	145195836	TJP1	ENSSSCG00000004854
1	168751582	169323977	THSD4	ENSSSCG00000004980
1	149737571	149773219	CYB5A	ENSSSCG00000004875
1	169725649	169734003	PNN	ENSSSCG00000022828
1	166925031	167002317	gene_sourceensembl	ENSSSCG00000040442
1	165296306	165405456	gene_sourceensembl	ENSSSCG00000034963
1	79955657	80136352	HS3ST5	ENSSSCG00000004433
1	72552922	72763546	CRYBG1	ENSSSCG00000004371
1	203059588	203333781	SLC24A2	ENSSSCG00000005167
1	73549307	73702020	SOBP	ENSSSCG00000004379
1	195937432	196051980	TEK	ENSSSCG00000005122
1	158167646	158195796	SERPINB5	ENSSSCG00000004894
1	264045669	264195883	STRBP	ENSSSCG00000005582
1	203936657	204942412	ADAMTSL1	ENSSSCG00000040366
1	201942463	202258794	FOCAD	ENSSSCG00000028406
1	256825486	257740977	ASTN2	ENSSSCG00000005502
1	257054228	257066909	TRIM32	ENSSSCG00000005501
1	98638339	99024642	DYM	ENSSSCG00000004508
1	162175573	162305305	ALPK2	ENSSSCG00000004918
1	123102009	123359649	FBN1	ENSSSCG00000004658
1	122876141	122979845	CEP152	ENSSSCG00000004657
1	235918747	236158098	UNC13B	ENSSSCG00000005305
1	119407351	119536419	MYO5C	ENSSSCG00000004621
1	116739096	116951464	gene_sourceensembl	ENSSSCG00000058800
1	236821414	236898276	RECK	ENSSSCG00000005338
1	241175935	241567921	gene_sourceensembl	ENSSSCG00000041432
1	82997993	83003528	RWDD2A	ENSSSCG00000029129
1	83003604	83029897	PGM3	ENSSSCG00000004456
1	83140635	83295785	UBE3D	ENSSSCG00000026346
1	90650560	90688002	TMEM30A	ENSSSCG00000033155
1	85755743	86017650	BCKDHB	ENSSSCG00000004465
1	56184753	56274865	gene_sourceensembl	ENSSSCG00000038663
1	207347360	207495965	TTC39B	ENSSSCG00000005186
1	246973436	247027527	TMEM38B	ENSSSCG00000039896
1	215071419	215507800	KDM4C	ENSSSCG00000005198
1	223836213	224680389	TRPM3	ENSSSCG00000005257
1	111588306	111635059	ANXA2	ENSSSCG00000004578
1	21913239	22165083	AIG1	ENSSSCG00000004136
1	112344228	112370404	BNIP2	ENSSSCG00000004582
1	112677821	112901993	MYO1E	ENSSSCG00000004587
1	27137558	27172720	IL20RA	ENSSSCG00000004157
1	27380142	27600493	MAP3K5	ENSSSCG00000026041
1	188335384	188511096	DAAM1	ENSSSCG00000005078
1	139730721	139804657	CHSY1	ENSSSCG00000004825
1	109931264	110104241	VPS13C	ENSSSCG00000036431
1	137199074	137297198	gene_sourceensembl	ENSSSCG00000027232
1	131728784	131746115	THBS1	ENSSSCG00000004789
1	132702541	132786532	RASGRP1	ENSSSCG00000004791
1	128489744	128635511	TTBK2	ENSSSCG00000004718
1	266933542	267105788	MVB12B	ENSSSCG00000036926
1	272776846	272824184	RALGDS	ENSSSCG00000005738
1	127317701	127650665	FRMD5	ENSSSCG00000004694
13	177365772	179013542	ROBO2	ENSSSCG00000012002
13	43548770	43886214	PTPRG	ENSSSCG00000011485
13	50509519	50538966	ARL6IP5	ENSSSCG00000033154
13	67698083	67872486	VGLL4	ENSSSCG00000030581
13	96377138	96390112	SSR3	ENSSSCG00000030567
13	98357815	98408589	MLF1	ENSSSCG00000059095
13	60946021	61037295	SUMF1	ENSSSCG00000011532
13	61068126	61398912	ITPR1	ENSSSCG00000023437
13	89742886	89889187	WWTR1	ENSSSCG00000011704
13	12507138	12575583	TOP2B	ENSSSCG00000011213
13	2840456	2959846	BTD	ENSSSCG00000011193
13	151722098	152005045	BBX	ENSSSCG00000011943
13	197130904	197161891	GART	ENSSSCG00000030677
13	14970324	16462743	RBMS3	ENSSSCG00000036381
13	195087457	195234678	gene_sourceensembl	ENSSSCG00000055848
13	83962618	84502327	SLC9A9	ENSSSCG00000011686
13	135105896	135249120	SLC12A8	ENSSSCG00000011860
13	144364317	144629174	GAP43	ENSSSCG00000031244
13	127414958	127572163	P3H2	ENSSSCG00000011813
13	133193252	133269447	SENP5	ENSSSCG00000011841
13	25209368	25751500	ULK4	ENSSSCG00000025408
13	37388517	38367504	ERC2	ENSSSCG00000024417
13	115939842	116331402	gene_sourceensembl	ENSSSCG00000042021
13	140601515	140620789	POPDC2	ENSSSCG00000011894
13	22268503	22655704	ITGA9	ENSSSCG00000011245
13	23020584	23116955	gene_sourceensembl	ENSSSCG00000011253
13	35025769	35180042	SFMBT1	ENSSSCG00000011454
13	34333113	34347589	ALAS1	ENSSSCG00000011437
13	34334876	34335175	Metazoa_SRP	ENSSSCG00000029540
6	27450632	27540118	TERB1	ENSSSCG00000035639
6	138634274	138914115	TNNI3K	ENSSSCG00000040109
6	138642013	138714551	gene_sourceensembl	ENSSSCG00000033405
6	116100372	116325133	GAREM1	ENSSSCG00000003731
6	4204080	4228567	MEAK7	ENSSSCG00000002672
6	152754924	153213127	FGGY	ENSSSCG00000003828
6	98278647	98385795	RAB31	ENSSSCG00000037264
6	99062354	99178468	MTCL1	ENSSSCG00000003684
6	164162518	164197379	CMPK1	ENSSSCG00000003885
6	166666138	166910646	RNF220	ENSSSCG00000037341
6	66928381	67016845	KCNAB2	ENSSSCG00000020749
6	165999904	166012377	TOE1	ENSSSCG00000003918
6	166003351	166012190	MUTYH	ENSSSCG00000003919
6	150835494	151426749	NFIA	ENSSSCG00000023243
6	40292951	40615673	ZNF536	ENSSSCG00000029234
6	42334736	42414830	DPY19L3	ENSSSCG00000022521
6	48971339	48982443	SNRPA	ENSSSCG00000002998
6	15698199	15863270	ZFHX3	ENSSSCG00000002752
6	17869929	18071522	TANGO6	ENSSSCG00000051585
6	45175500	45181391	LIN37	ENSSSCG00000002898
6	51854998	51875169	RTN2	ENSSSCG00000036870
6	52053281	52069166	FBXO46	ENSSSCG00000038367
6	52874828	52877190	TMEM160	ENSSSCG00000003109
6	79849698	79958334	HSPG2	ENSSSCG00000003514
6	54581133	54599783	FCGRT	ENSSSCG00000003187
6	54599719	54611272	RCN3	ENSSSCG00000024823
6	54655414	54675109	gene_sourceensembl	ENSSSCG00000032668
6	71863637	71881820	MTHFR	ENSSSCG00000003428
6	54250515	54266893	RUVBL2	ENSSSCG00000003152
2	129880661	130026419	MARCHF3	ENSSSCG00000014249
2	103414746	103448260	gene_sourceensembl	ENSSSCG00000046723
2	49028923	49083590	AMPD3	ENSSSCG00000022492
2	41593802	41647247	USH1C	ENSSSCG00000013377
2	44967986	45299677	SPON1	ENSSSCG00000013393
2	47042505	47240103	gene_sourceensembl	ENSSSCG00000031706
2	136972507	137030430	DDX46	ENSSSCG00000026644
2	139632869	139920497	KLHL3	ENSSSCG00000014321
2	25514193	25591617	PAMR1	ENSSSCG00000028338
2	65062766	65072679	ASF1B	ENSSSCG00000013772
2	62222249	62241611	AKAP8	ENSSSCG00000013837
2	112964557	112969541	gene_sourceensembl	ENSSSCG00000056470
2	60057941	60126607	gene_sourceensembl	ENSSSCG00000013880
2	69880583	69890255	SPC24	ENSSSCG00000033444
2	70036931	70039730	TMEM205	ENSSSCG00000013622
2	87322934	87349878	LHFPL2	ENSSSCG00000028536
2	12199231	12237615	DTX4	ENSSSCG00000013145
2	81378725	81390230	RNF44	ENSSSCG00000014056
2	13217759	13227516	BTBD18	ENSSSCG00000013175
2	17750660	17803126	CD82	ENSSSCG00000029521
2	88022936	88089403	JMY	ENSSSCG00000014112
2	88122882	88255281	HOMER1	ENSSSCG00000014113
2	1675360	1989111	KCNQ1	ENSSSCG00000039556
2	5776539	5784337	RBM4	ENSSSCG00000058325
2	5759098	5800748	RBM14	ENSSSCG00000038008
2	11876324	11911656	OSBP	ENSSSCG00000013125
2	14548428	14724474	PTPRJ	ENSSSCG00000023709
2	74357517	74378592	UBXN6	ENSSSCG00000013510
2	74414466	74445447	SH3GL1	ENSSSCG00000013508
2	6804687	6811446	gene_sourceensembl	ENSSSCG00000056754
2	5480807	5488638	gene_sourceensembl	ENSSSCG00000049464
14	97558533	98793010	PRKG1	ENSSSCG00000010429
14	92612745	92617686	gene_sourceensembl	ENSSSCG00000057417
14	20026685	20127155	CLCN3	ENSSSCG00000009713
14	10427957	10545704	DPYSL2	ENSSSCG00000030130
14	13335420	13768423	MSRA	ENSSSCG00000009684
14	60309931	60346280	ABCB10	ENSSSCG00000010188
14	59367739	59388749	FAM89A	ENSSSCG00000038765
14	30577661	30646243	MLXIP	ENSSSCG00000009794
14	57424906	57481823	MAP3K21	ENSSSCG00000010164
14	74120050	74205263	UNC5B	ENSSSCG00000010276
14	7435867	7540704	LOXL2	ENSSSCG00000033608
14	76700173	76811869	VCL	ENSSSCG00000010313
14	77957851	79051455	LRMDA	ENSSSCG00000034308
14	79069841	79077949	gene_sourceensembl	ENSSSCG00000051955
14	79071706	79077949	gene_sourceensembl	ENSSSCG00000055136
14	131412630	131592789	ATE1	ENSSSCG00000010699
14	131487780	131551184	gene_sourceensembl	ENSSSCG00000057767
14	24059019	24241176	ADGRD1	ENSSSCG00000009745
14	44962578	44972169	gene_sourceensembl	ENSSSCG00000046022
14	113245502	113379471	GBF1	ENSSSCG00000010579
14	87492458	87588543	WAPL	ENSSSCG00000010357
14	113500842	113626003	SUFU	ENSSSCG00000010586
14	125406698	126180777	ATRNL1	ENSSSCG00000010654
14	126277875	126499465	GFRA1	ENSSSCG00000010655
15	37957508	38065628	gene_sourceensembl	ENSSSCG00000053249
15	23676683	23699582	INSIG2	ENSSSCG00000036229
15	121580803	121586006	INHA	ENSSSCG00000020771
15	132355655	132361435	PTMA	ENSSSCG00000037274
15	65920292	66165991	TANC1	ENSSSCG00000015880
15	132375743	132426683	PDE6D	ENSSSCG00000016279
15	83146002	83391984	AGPS	ENSSSCG00000023983
15	83365723	83757934	PDE11A	ENSSSCG00000038903
15	44918066	44925867	ING2	ENSSSCG00000024555
15	15150486	15156595	gene_sourceensembl	ENSSSCG00000052934
15	7757935	8051594	GTDC1	ENSSSCG00000015670
15	59312418	59410302	SAP130	ENSSSCG00000015859
15	137444855	137481025	RBM44	ENSSSCG00000016332
15	101623813	101627588	gene_sourceensembl	ENSSSCG00000061867
15	95097154	95140478	NEMP2	ENSSSCG00000016053
15	95593211	95646260	STAT1	ENSSSCG00000016057
15	80521045	80597247	gene_sourceensembl	ENSSSCG00000027348
15	80673067	80692208	CHRNA1	ENSSSCG00000015969
15	75852198	75874951	BBS5	ENSSSCG00000015931
15	79935994	80025850	SP3	ENSSSCG00000015962
15	81446646	81693328	gene_sourceensembl	ENSSSCG00000041478
9	88798831	88858006	TMEM196	ENSSSCG00000015373
9	83322823	83418902	ETV1	ENSSSCG00000024591
9	90337449	90410268	SP4	ENSSSCG00000015378
9	90423092	90768353	DNAH11	ENSSSCG00000015379
9	33084820	33160311	gene_sourceensembl	ENSSSCG00000031170
9	113364879	113394389	ARHGEF5	ENSSSCG00000022525
9	102221326	102348696	PHTF2	ENSSSCG00000015410
9	6291930	6319409	PGAP2	ENSSSCG00000035653
9	13045196	13820420	TENM4	ENSSSCG00000014894
9	4688142	4706360	gene_sourceensembl	ENSSSCG00000055108
9	41947589	41956210	RBM7	ENSSSCG00000027905
9	130473857	130511246	VASH2	ENSSSCG00000015589
9	44223232	44513831	SIK3	ENSSSCG00000015071
9	47256317	47284006	TRIM29	ENSSSCG00000015126
9	47639988	48097870	GRIK4	ENSSSCG00000015131
9	49982284	49990508	HSPA8	ENSSSCG00000015140
9	66838119	67116126	gene_sourceensembl	ENSSSCG00000015645
9	123592695	123596100	gene_sourceensembl	ENSSSCG00000055992
9	68983827	69497001	ZNF804B	ENSSSCG00000015300
9	46789726	46891304	NECTIN1	ENSSSCG00000015125
9	65175377	65219742	MDM4	ENSSSCG00000015284
9	12663657	12851342	GAB2	ENSSSCG00000014891
8	16897288	17044570	GBA3	ENSSSCG00000008754
8	10401350	10472136	CPEB2	ENSSSCG00000038410
8	85084133	85514516	INPP4B	ENSSSCG00000009050
8	87478173	87527188	SETD7	ENSSSCG00000030396
8	127730902	128953332	CCSER1	ENSSSCG00000022986
8	132761720	133242014	ARHGAP24	ENSSSCG00000009229
8	80675002	81024452	ARHGAP10	ENSSSCG00000009029
8	36874331	36942773	GABRA4	ENSSSCG00000030515
8	38241598	38322031	SLAIN2	ENSSSCG00000008821
8	32433318	32792546	LIMCH1	ENSSSCG00000008799
8	27771423	27960542	ARAP2	ENSSSCG00000008768
8	67706874	68177212	SLC4A4	ENSSSCG00000008943
8	8774790	9125240	RAB28	ENSSSCG00000022358
8	71990119	72088829	CCDC158	ENSSSCG00000008983
3	66128689	66884740	LRRTM4	ENSSSCG00000008259
3	114871164	115177466	KLHL29	ENSSSCG00000008593
3	51400171	51496293	TMEM182	ENSSSCG00000008150
3	54135532	54727885	AFF3	ENSSSCG00000055832
3	34939573	37300810	RBFOX1	ENSSSCG00000007917
3	38952689	38973906	ZNF200	ENSSSCG00000007965
3	40244011	40256980	JPT2	ENSSSCG00000008019
3	16161580	16169453	SBDS	ENSSSCG00000007732
3	3902005	3993819	TNRC18	ENSSSCG00000022553
3	112263915	112272621	CENPA	ENSSSCG00000038543
3	8005900	8014053	MCM7	ENSSSCG00000032180
3	107542096	107658455	MEMO1	ENSSSCG00000008515
3	8531228	8533932	MOSPD3	ENSSSCG00000023255
3	9003743	9158130	COL26A1	ENSSSCG00000058972
3	46280341	46315694	MALL	ENSSSCG00000059997
3	44509680	44605014	ANAPC1	ENSSSCG00000008105
3	25425727	25466259	PDILT	ENSSSCG00000007860
3	86252277	86536926	EML6	ENSSSCG00000026559
3	89803519	90382034	NRXN1	ENSSSCG00000026180
3	26447342	26548657	SYT17	ENSSSCG00000022200
3	22619492	22635288	NDUFAB1	ENSSSCG00000010795
3	28968215	29167637	MRTFB	ENSSSCG00000039171
3	124172098	124196210	TRIB2	ENSSSCG00000039080
3	72794158	72968194	AAK1	ENSSSCG00000008337
4	18690198	18924971	COL14A1	ENSSSCG00000005997
4	51525047	51570425	LRRCC1	ENSSSCG00000006146
4	57872116	57977574	PKIA	ENSSSCG00000006163
4	2919511	3015334	AGO2	ENSSSCG00000005935
4	123202753	123331144	ABCA4	ENSSSCG00000006890
4	600698	605701	SHARPIN	ENSSSCG00000005914
4	117875002	117936612	DBT	ENSSSCG00000006866
4	94710647	94719248	EFNA3	ENSSSCG00000006531
4	78527519	78981003	SNTG1	ENSSSCG00000034495
4	94026386	94080420	ARHGEF2	ENSSSCG00000006502
4	72573453	72694146	CHD7	ENSSSCG00000006231
4	100264968	100425692	CHD1L	ENSSSCG00000006701
4	102827190	102878585	WDR3	ENSSSCG00000006727
4	102878719	102943549	GDAP2	ENSSSCG00000006728
4	103613177	103623225	TRIM45	ENSSSCG00000006732
4	36886588	37041502	RGS22	ENSSSCG00000006069
4	87756168	87911296	DDR2	ENSSSCG00000006338
4	88140953	88471994	NOS1AP	ENSSSCG00000006344
X	91323764	91644567	DCX	ENSSSCG00000012585
X	124275305	124295445	BGN	ENSSSCG00000012766
X	36271222	36304181	ATP6AP2	ENSSSCG00000012247
X	43000231	43029468	OTUD5	ENSSSCG00000021934
X	69137455	69702177	DACH2	ENSSSCG00000036515
X	43232192	43246680	SYP	ENSSSCG00000012292
X	43613628	43811526	CLCN5	ENSSSCG00000023026
X	109536504	109973607	GPC3	ENSSSCG00000012680
X	10217924	10283810	EGFL6	ENSSSCG00000012121
X	89204355	89221085	IRS4	ENSSSCG00000031027
X	20756725	21062175	POLA1	ENSSSCG00000022240
X	17889030	17938293	SMPX	ENSSSCG00000032720
7	111039633	111451893	FOXN3	ENSSSCG00000002429
7	112038234	112090510	NRDE2	ENSSSCG00000002434
7	19383196	19486265	KIAA0319	ENSSSCG00000001091
7	74294948	74552433	STXBP6	ENSSSCG00000001977
7	85983837	86106938	CHD2	ENSSSCG00000002266
7	86777920	87103309	SLCO3A1	ENSSSCG00000002263
7	87568026	87766335	SV2B	ENSSSCG00000002262
7	75094926	75106331	TSSK4	ENSSSCG00000025470
7	91592424	92345294	RAD51B	ENSSSCG00000028877
7	115208700	115258654	ASB2	ENSSSCG00000002467
7	66915881	67375177	AKAP6	ENSSSCG00000024517
7	115304871	115327054	OTUB2	ENSSSCG00000002469
7	75159236	75161829	EMC9	ENSSSCG00000002005
7	92929069	93041442	GALNT16	ENSSSCG00000002306
7	59714080	59840591	NPTN	ENSSSCG00000001918
7	97745396	97852502	LTBP2	ENSSSCG00000002368
7	75100273	75110446	TM9SF1	ENSSSCG00000054655
7	9735660	9853788	GFOD1	ENSSSCG00000035867
7	195083	341442	EXOC2	ENSSSCG00000000985
7	58525143	58549430	PPCDC	ENSSSCG00000027478
7	51006366	51363620	ADAMTSL3	ENSSSCG00000001793
7	34188145	34479623	DNAH8	ENSSSCG00000062622
7	28812252	29300152	DST	ENSSSCG00000001499
5	34067941	34218520	MYRFL	ENSSSCG00000023936
5	51536526	51691595	ABCC9	ENSSSCG00000000571
5	76113236	76337069	ANO6	ENSSSCG00000000804
5	19446086	19484463	CBX5	ENSSSCG00000039191
5	12505654	12526232	FBXO7	ENSSSCG00000000156
5	90815202	90817142	BTG1	ENSSSCG00000035790
5	68000905	68140755	WNK1	ENSSSCG00000000753
5	4771417	4849326	SHISAL1	ENSSSCG00000039522
5	21126571	21148776	ITGA7	ENSSSCG00000036237
5	22785445	22789829	DDIT3	ENSSSCG00000050998
5	22957875	23004458	OS9	ENSSSCG00000035875
5	23017176	23033517	AGAP2	ENSSSCG00000038732
5	23029306	23038977	TSPAN31	ENSSSCG00000036731
16	32129612	32304592	ITGA1	ENSSSCG00000016885
16	32142034	32148287	PELO	ENSSSCG00000016884
16	37412909	37728502	RAB3C	ENSSSCG00000031796
16	48708610	48780941	ZNF366	ENSSSCG00000016976
16	50206076	50361859	NSG2	ENSSSCG00000016979
16	66253604	66292961	TIMD4	ENSSSCG00000017062
16	66010772	66082185	ITK	ENSSSCG00000038003
16	71857258	71913723	ANXA6	ENSSSCG00000017089
16	68390880	68484918	LARP1	ENSSSCG00000017069
11	42033851	42419734	KLHL1	ENSSSCG00000009456
11	47543815	47828208	TBC1D4	ENSSSCG00000009464
11	69710364	70022727	NALCN	ENSSSCG00000038949
11	70042232	70246968	ITGBL1	ENSSSCG00000009526
11	70251446	70422192	FGF14	ENSSSCG00000009527
11	11815357	12158826	DCLK1	ENSSSCG00000033919
11	60791363	62147239	GPC5	ENSSSCG00000031946
11	3277951	3793881	ATP8A2	ENSSSCG00000035421
11	4054442	4161481	CDK8	ENSSSCG00000009298
10	19421565	19551840	SUSD4	ENSSSCG00000011176
10	11466004	11486974	BROX	ENSSSCG00000010836
10	26627425	26703223	PTCH1	ENSSSCG00000027312
17	30338391	30341628	NXT1	ENSSSCG00000007119
17	25681197	25923004	PCSK2	ENSSSCG00000007083
17	34268612	34309991	RSPO4	ENSSSCG00000007197
17	35914246	35961522	KIF3B	ENSSSCG00000007247
17	38792187	38797005	GDF5	ENSSSCG00000023261
12	35396567	35433299	SKA2	ENSSSCG00000034217
12	35573495	35644199	YPEL2	ENSSSCG00000035400
12	20613996	20636073	RAB5C	ENSSSCG00000032467
12	27979331	28615807	CA10	ENSSSCG00000023169
12	20901396	20931210	JUP	ENSSSCG00000017428
12	24154145	24185797	SP2	ENSSSCG00000017516
12	24224263	24234467	CDK5RAP3	ENSSSCG00000017524
12	47388582	47497902	RPH3AL	ENSSSCG00000036705
12	47904173	47915520	TLCD2	ENSSSCG00000040205
12	48172707	48386884	SMG6	ENSSSCG00000017826
12	49754166	49759412	TAX1BP3	ENSSSCG00000017866
12	49922855	49950605	CAMKK1	ENSSSCG00000017873
12	50266696	50348689	UBE2G1	ENSSSCG00000058778
12	18251428	18258295	HEXIM2	ENSSSCG00000017335
12	18344084	18363713	DCAKD	ENSSSCG00000017340
12	15353867	15374858	KCNH6	ENSSSCG00000017295
12	53906511	53964514	PIK3R6	ENSSSCG00000017990
12	6838425	6881472	TTYH2	ENSSSCG00000017238
12	52868434	52874249	EIF4A1	ENSSSCG00000017957
18	45454213	45466537	HOXA3	ENSSSCG00000016705
18	14684036	14752310	AKR1B1	ENSSSCG00000040608
18	10531897	10588832	ZC3HAV1	ENSSSCG00000016512
18	28946326	28993961	WNT2	ENSSSCG00000016628
18	29027811	29285505	ST7	ENSSSCG00000016629
18	3148483	4054118	DPP6	ENSSSCG00000016423
