# Supplementary material for: LncRNA TCONS_00323213 Promotes Myogenic Differentiation by Interacting with PKNOX2 to Upregulate MyoG in Porcine Satellite Cells
Source: Int J Mol Sci. 2023 Apr 5;24(7):6773. doi: 10.3390/ijms24076773 (PMC10094759; doi:10.3390/ijms24076773)
Supplement: Supplementary file 1 [file ijms-24-06773-s001.zip › Table S4.xlsx]

## Sheet: Sheet1
ENSSSCG00000004349
ENSSSCG00000005266
ENSSSCG00000005036
ENSSSCG00000004270
ENSSSCG00000004952
ENSSSCG00000004951
ENSSSCG00000004962
ENSSSCG00000004371
ENSSSCG00000005502
ENSSSCG00000004638
ENSSSCG00000029129
ENSSSCG00000004456
ENSSSCG00000004453
ENSSSCG00000004318
ENSSSCG00000004332
ENSSSCG00000005211
ENSSSCG00000005212
ENSSSCG00000004209
ENSSSCG00000005078
ENSSSCG00000020666
ENSSSCG00000004830
ENSSSCG00000005110
ENSSSCG00000004725
ENSSSCG00000005706
ENSSSCG00000005707
ENSSSCG00000004702
ENSSSCG00000012006
ENSSSCG00000023891
ENSSSCG00000028905
ENSSSCG00000011635
ENSSSCG00000023437
ENSSSCG00000011698
ENSSSCG00000030335
ENSSSCG00000036381
ENSSSCG00000011230
ENSSSCG00000011813
ENSSSCG00000011882
ENSSSCG00000024417
ENSSSCG00000035639
ENSSSCG00000033425
ENSSSCG00000002648
ENSSSCG00000032115
ENSSSCG00000002684
ENSSSCG00000003731
ENSSSCG00000003640
ENSSSCG00000037341
ENSSSCG00000003809
ENSSSCG00000022521
ENSSSCG00000056207
ENSSSCG00000039751
ENSSSCG00000021519
ENSSSCG00000023371
ENSSSCG00000028878
ENSSSCG00000052747
ENSSSCG00000052748
ENSSSCG00000003100
ENSSSCG00000003513
ENSSSCG00000059693
ENSSSCG00000039373
ENSSSCG00000032877
ENSSSCG00000022492
ENSSSCG00000013382
ENSSSCG00000034191
ENSSSCG00000013295
ENSSSCG00000013754
ENSSSCG00000062580
ENSSSCG00000034062
ENSSSCG00000013927
ENSSSCG00000044637
ENSSSCG00000013276
ENSSSCG00000013650
ENSSSCG00000029521
ENSSSCG00000013043
ENSSSCG00000032170
ENSSSCG00000027307
ENSSSCG00000041050
ENSSSCG00000010429
ENSSSCG00000010447
ENSSSCG00000009684
ENSSSCG00000036480
ENSSSCG00000059472
ENSSSCG00000063011
ENSSSCG00000010281
ENSSSCG00000033608
ENSSSCG00000010293
ENSSSCG00000043646
ENSSSCG00000010319
ENSSSCG00000034308
ENSSSCG00000052143
ENSSSCG00000010579
ENSSSCG00000015746
ENSSSCG00000015814
ENSSSCG00000029073
ENSSSCG00000016323
ENSSSCG00000061354
ENSSSCG00000042348
ENSSSCG00000015358
ENSSSCG00000015333
ENSSSCG00000025806
ENSSSCG00000015232
ENSSSCG00000034654
ENSSSCG00000015523
ENSSSCG00000015507
ENSSSCG00000015508
ENSSSCG00000029865
ENSSSCG00000035554
ENSSSCG00000031780
ENSSSCG00000015543
ENSSSCG00000039996
ENSSSCG00000014811
ENSSSCG00000029388
ENSSSCG00000015099
ENSSSCG00000014904
ENSSSCG00000053031
ENSSSCG00000008747
ENSSSCG00000009053
ENSSSCG00000009111
ENSSSCG00000026196
ENSSSCG00000008841
ENSSSCG00000031700
ENSSSCG00000008190
ENSSSCG00000037232
ENSSSCG00000007700
ENSSSCG00000040985
ENSSSCG00000007585
ENSSSCG00000007586
ENSSSCG00000033450
ENSSSCG00000026180
ENSSSCG00000033674
ENSSSCG00000039171
ENSSSCG00000005965
ENSSSCG00000006215
ENSSSCG00000042468
ENSSSCG00000006550
ENSSSCG00000006635
ENSSSCG00000006709
ENSSSCG00000035488
ENSSSCG00000051065
ENSSSCG00000012656
ENSSSCG00000012510
ENSSSCG00000012545
ENSSSCG00000012201
ENSSSCG00000035893
ENSSSCG00000002429
ENSSSCG00000025488
ENSSSCG00000001947
ENSSSCG00000028877
ENSSSCG00000002004
ENSSSCG00000024517
ENSSSCG00000002368
ENSSSCG00000000985
ENSSSCG00000036566
ENSSSCG00000038514
ENSSSCG00000041171
ENSSSCG00000001499
ENSSSCG00000021411
ENSSSCG00000030165
ENSSSCG00000000045
ENSSSCG00000016929
ENSSSCG00000016855
ENSSSCG00000017089
ENSSSCG00000017082
ENSSSCG00000009526
ENSSSCG00000024635
ENSSSCG00000046385
ENSSSCG00000035421
ENSSSCG00000035850
ENSSSCG00000011090
ENSSSCG00000011102
ENSSSCG00000010915
ENSSSCG00000039779
ENSSSCG00000007034
ENSSSCG00000030112
ENSSSCG00000007079
ENSSSCG00000063332
ENSSSCG00000007155
ENSSSCG00000063004
ENSSSCG00000020796
ENSSSCG00000017510
ENSSSCG00000023169
ENSSSCG00000017583
ENSSSCG00000034858
ENSSSCG00000060696
ENSSSCG00000037832
ENSSSCG00000017963
ENSSSCG00000033537
ENSSSCG00000016690
ENSSSCG00000016435
ENSSSCG00000016423
ENSSSCG00000027046
ENSSSCG00000037594
ENSSSCG00000031354
ENSSSCG00000004980
ENSSSCG00000004875
ENSSSCG00000005167
ENSSSCG00000005122
ENSSSCG00000040366
ENSSSCG00000004918
ENSSSCG00000004657
ENSSSCG00000004621
ENSSSCG00000041432
ENSSSCG00000004465
ENSSSCG00000038663
ENSSSCG00000005186
ENSSSCG00000005198
ENSSSCG00000026041
ENSSSCG00000027232
ENSSSCG00000004789
ENSSSCG00000004791
ENSSSCG00000004694
ENSSSCG00000033154
ENSSSCG00000030581
ENSSSCG00000030567
ENSSSCG00000011704
ENSSSCG00000055848
ENSSSCG00000031244
ENSSSCG00000011894
ENSSSCG00000011245
ENSSSCG00000040109
ENSSSCG00000003828
ENSSSCG00000020749
ENSSSCG00000002998
ENSSSCG00000002752
ENSSSCG00000051585
ENSSSCG00000036870
ENSSSCG00000003514
ENSSSCG00000032668
ENSSSCG00000046723
ENSSSCG00000013393
ENSSSCG00000031706
ENSSSCG00000028338
ENSSSCG00000013772
ENSSSCG00000033444
ENSSSCG00000013622
ENSSSCG00000014056
ENSSSCG00000013175
ENSSSCG00000039556
ENSSSCG00000023709
ENSSSCG00000049464
ENSSSCG00000009794
ENSSSCG00000010276
ENSSSCG00000051955
ENSSSCG00000009745
ENSSSCG00000046022
ENSSSCG00000010655
ENSSSCG00000036229
ENSSSCG00000020771
ENSSSCG00000037274
ENSSSCG00000052934
ENSSSCG00000015670
ENSSSCG00000061867
ENSSSCG00000016053
ENSSSCG00000016057
ENSSSCG00000015969
ENSSSCG00000041478
ENSSSCG00000015373
ENSSSCG00000024591
ENSSSCG00000015379
ENSSSCG00000022525
ENSSSCG00000015131
ENSSSCG00000015645
ENSSSCG00000055992
ENSSSCG00000009050
ENSSSCG00000030396
ENSSSCG00000022986
ENSSSCG00000009229
ENSSSCG00000009029
ENSSSCG00000008799
ENSSSCG00000008768
ENSSSCG00000022358
ENSSSCG00000054566
ENSSSCG00000008150
ENSSSCG00000007917
ENSSSCG00000061098
ENSSSCG00000007589
ENSSSCG00000007732
ENSSSCG00000022553
ENSSSCG00000038543
ENSSSCG00000023320
ENSSSCG00000032180
ENSSSCG00000059997
ENSSSCG00000022200
ENSSSCG00000008337
ENSSSCG00000005997
ENSSSCG00000006163
ENSSSCG00000062256
ENSSSCG00000051057
ENSSSCG00000006866
ENSSSCG00000061828
ENSSSCG00000006732
ENSSSCG00000006344
ENSSSCG00000051991
ENSSSCG00000012585
ENSSSCG00000012247
ENSSSCG00000012680
ENSSSCG00000031027
ENSSSCG00000022240
ENSSSCG00000032720
ENSSSCG00000001091
ENSSSCG00000058584
ENSSSCG00000001977
ENSSSCG00000002266
ENSSSCG00000002467
ENSSSCG00000002005
ENSSSCG00000001918
ENSSSCG00000001793
ENSSSCG00000000571
