# Supplementary material for: LncRNA TCONS_00323213 Promotes Myogenic Differentiation by Interacting with PKNOX2 to Upregulate MyoG in Porcine Satellite Cells
Source: Int J Mol Sci. 2023 Apr 5;24(7):6773. doi: 10.3390/ijms24076773 (PMC10094759; doi:10.3390/ijms24076773)
Supplement: Supplementary file 1 [file ijms-24-06773-s001.zip › Table S5.xlsx]

## Sheet: Sheet1
name	primer	sequence(5'-3')	TM(℃）	Length(bp）
TCONS_00323213 for RACE	5'RACE primer	GTGCCAACCGTGACCATTTCCGTA	Touch Down
	3'RACE primer	TTTTCAATTCAAAATTGATTTTAT
	Short primer	CTAATACGACTCACTATAGGGC
	Long primer	TAATACGACTCACTATAGGGCAAGCAGTGGTATCAACGCAGAGT
TCONS_00323213 for qPCR	Forward primer	GCTTGGTATTCTGTGCTTAG	61	238
	Reverse primer	CCTCTTCTTCCTCCTGACT
TCONS_00323213 for pull down-1	Forward primer	CTACACCACCACAGCGAAGC	60	1600
	Reverse primer	ACCTCCTGGACTCTGGCACA
TCONS_00323213 for pull down-2	Forward primer	GAAGGTGAGATTGGAGGTAAGGG	62	2317
	Reverse primer	GACGGGAGTAGGAAGGATGC
TCONS_00323213 for pull down-3	Forward primer	AAGGCATTAGGCTTGGACTGG	60	1794
	Reverse primer	TCGTCGCACTTTACAGAGAGG
TCONS_00323213 for pull down-4	Forward primer	TCCACCAAGTCCCAGGCAGT	59	1660
	Reverse primer	GAAAAGTCTATGTTCCCCCCAC
TCONS_00323213 for pull down-5	Forward primer	GTAGGTGCCAACCGTGACCA	63	887
	Reverse primer	AGATACAGCCTTTAGACACA
PKNOX2 full length	Forward primer	ATGATGCAACATGCCTCCCCAGCCC	61	1419
	Reverse primer	CTACTCCAGGGAGTCACTGTGTTCC
PKNOX2 for qPCR	Forward primer	CTTGACCTCACCTCCCTCCT	58	155
	Reverse primer	GCCGCAATCTGTCTCTTCTC
MYOD	Forward primer	GGCTGCCCAAGGTGGAAATC	60	170
	Reverse primer	TGCGTCTGAGTCACCGCTGTAG
MYOG	Forward primer	ATGAGACATCCCCCTACTTCTACCA	60	160
	Reverse primer	GTCCCCAGCCCCTTATCTTCC
MEF2C	Forward primer	GTGTCCAGCCACAACAGTTTG	56	248
	Reverse primer	TTACCAGGTGAGACCAGCAGA
MYHC	Forward primer	GTTCAGAGAAAGGCATCCCAAA	60	135
	Reverse primer	GAGAGTGACCGACACCACAAGTG
GAPDH	Forward primer	CGTCCCTGAGACACGATGGT	60
	Reverse primer	GCCTTGACTGTGCCGTGGAAC
