# Supplementary material for: LncRNA TCONS_00323213 Promotes Myogenic Differentiation by Interacting with PKNOX2 to Upregulate MyoG in Porcine Satellite Cells
Source: Int J Mol Sci. 2023 Apr 5;24(7):6773. doi: 10.3390/ijms24076773 (PMC10094759; doi:10.3390/ijms24076773)
Supplement: Supplementary file 1 [file ijms-24-06773-s001.zip › Table S6.xlsx]

## Sheet: Sheet1
Table S6. Overview of RNA-seq data for 12 samples (S. scrofa 11.1 genome)
样本编号	总读数	基础读数	GC含量(%)	Q30
Sample ID	ReadSum	BaseSum	GC content (%)	Q30(%)
D 36h ASO-1	69598621	20764253718	52.42	93.05
D 36h ASO-2	85727894	25608483050	51.12	92.98
D 36h ASO-3	75465546	22540423402	50.79	92.97
D 36h NC-1	64895254	19375295642	50.59	92.93
D 36h NC-2	67919533	20284495810	50.48	93.03
D 36h NC-3	66230282	19740456692	50.58	93.1
